# Supplementary material for: Plasmodium falciparum translational machinery condones polyadenosine repeats
Source: eLife. 2020 May 29;9:e57799. doi: 10.7554/eLife.57799 (PMC7295572; doi:10.7554/eLife.57799)
Supplement: Figure 1—source data 1. [file elife-57799-fig1-data1.xlsx]

## Sheet: Source data Figure 1A
Organism	LysCodonPat	Value
Acyrthosiphon pisum	4AAG	3.83795
Acyrthosiphon pisum	3AAG+1AAA	12.2957
Acyrthosiphon pisum	2AAG+2AAA	20.9666
Acyrthosiphon pisum	1AAG+3AAA	35.7498
Acyrthosiphon pisum	4AAA	24.3781
Ailuropoda melanoleuca	4AAG	15.7428
Ailuropoda melanoleuca	3AAG+1AAA	37.694
Ailuropoda melanoleuca	2AAG+2AAA	21.5078
Ailuropoda melanoleuca	1AAG+3AAA	9.53437
Ailuropoda melanoleuca	4AAA	5.6541
Amphimedon queenslandica	4AAG	11.7569
Amphimedon queenslandica	3AAG+1AAA	33.8177
Amphimedon queenslandica	2AAG+2AAA	34.0819
Amphimedon queenslandica	1AAG+3AAA	10.4359
Amphimedon queenslandica	4AAA	1.4531
Anas platyrhynchos	4AAG	16.7358
Anas platyrhynchos	3AAG+1AAA	30.1521
Anas platyrhynchos	2AAG+2AAA	23.9281
Anas platyrhynchos	1AAG+3AAA	12.1715
Anas platyrhynchos	4AAA	10.0968
Anolis carolinensis	4AAG	20.8038
Anolis carolinensis	3AAG+1AAA	36.7612
Anolis carolinensis	2AAG+2AAA	23.9953
Anolis carolinensis	1AAG+3AAA	7.56501
Anolis carolinensis	4AAA	1.65485
Anopheles darlingi	4AAG	29.2754
Anopheles darlingi	3AAG+1AAA	38.8406
Anopheles darlingi	2AAG+2AAA	17.971
Anopheles darlingi	1AAG+3AAA	3.47826
Anopheles darlingi	4AAA	0
Anopheles gambiae	4AAG	27.1347
Anopheles gambiae	3AAG+1AAA	49.5256
Anopheles gambiae	2AAG+2AAA	14.4213
Anopheles gambiae	1AAG+3AAA	1.89753
Anopheles gambiae	4AAA	0.948767
Apis mellifera	4AAG	9.53678
Apis mellifera	3AAG+1AAA	28.7466
Apis mellifera	2AAG+2AAA	19.0736
Apis mellifera	1AAG+3AAA	33.6512
Apis mellifera	4AAA	5.99455
Astyanax mexicanus	4AAG	25.4917
Astyanax mexicanus	3AAG+1AAA	36.9788
Astyanax mexicanus	2AAG+2AAA	13.1393
Astyanax mexicanus	1AAG+3AAA	5.66483
Astyanax mexicanus	4AAA	8.18253
Atta cephalotes	4AAG	17.2581
Atta cephalotes	3AAG+1AAA	33.3871
Atta cephalotes	2AAG+2AAA	26.7742
Atta cephalotes	1AAG+3AAA	13.871
Atta cephalotes	4AAA	1.93548
Bigelowiella natans	4AAG	44.1729
Bigelowiella natans	3AAG+1AAA	30.8271
Bigelowiella natans	2AAG+2AAA	12.594
Bigelowiella natans	1AAG+3AAA	5.26316
Bigelowiella natans	4AAA	0.902256
Bombyx mori	4AAG	10.0193
Bombyx mori	3AAG+1AAA	33.7187
Bombyx mori	2AAG+2AAA	33.3333
Bombyx mori	1AAG+3AAA	15.6069
Bombyx mori	4AAA	0.385356
Bos taurus	4AAG	24.052
Bos taurus	3AAG+1AAA	29.2524
Bos taurus	2AAG+2AAA	23.8353
Bos taurus	1AAG+3AAA	8.23402
Bos taurus	4AAA	4.00867
Brugia malayi	4AAG	3.91061
Brugia malayi	3AAG+1AAA	25.8845
Brugia malayi	2AAG+2AAA	23.0912
Brugia malayi	1AAG+3AAA	27.3743
Brugia malayi	4AAA	14.7114
Caenorhabditis brenneri	4AAG	20.2604
Caenorhabditis brenneri	3AAG+1AAA	38.6493
Caenorhabditis brenneri	2AAG+2AAA	20.9927
Caenorhabditis brenneri	1AAG+3AAA	6.99756
Caenorhabditis brenneri	4AAA	0.488202
Caenorhabditis briggsae	4AAG	30.6434
Caenorhabditis briggsae	3AAG+1AAA	33.9149
Caenorhabditis briggsae	2AAG+2AAA	18.8659
Caenorhabditis briggsae	1AAG+3AAA	6.10687
Caenorhabditis briggsae	4AAA	0.545256
Caenorhabditis elegans	4AAG	20.463
Caenorhabditis elegans	3AAG+1AAA	35.8333
Caenorhabditis elegans	2AAG+2AAA	22.5926
Caenorhabditis elegans	1AAG+3AAA	7.31481
Caenorhabditis elegans	4AAA	0.185185
Caenorhabditis japonica	4AAG	20.9479
Caenorhabditis japonica	3AAG+1AAA	36.6825
Caenorhabditis japonica	2AAG+2AAA	16.2085
Caenorhabditis japonica	1AAG+3AAA	5.21327
Caenorhabditis japonica	4AAA	0.947867
Caenorhabditis remanei	4AAG	20.0159
Caenorhabditis remanei	3AAG+1AAA	38.5167
Caenorhabditis remanei	2AAG+2AAA	26.4753
Caenorhabditis remanei	1AAG+3AAA	5.18341
Caenorhabditis remanei	4AAA	0.797448
Callithrix jacchus	4AAG	19.3248
Callithrix jacchus	3AAG+1AAA	36.0303
Callithrix jacchus	2AAG+2AAA	21.0128
Callithrix jacchus	1AAG+3AAA	10.0116
Callithrix jacchus	4AAA	3.60885
Canis familiaris	4AAG	19.8113
Canis familiaris	3AAG+1AAA	32.5472
Canis familiaris	2AAG+2AAA	21.3836
Canis familiaris	1AAG+3AAA	10.456
Canis familiaris	4AAA	5.73899
Capitella teleta	4AAG	29.9206
Capitella teleta	3AAG+1AAA	33.9683
Capitella teleta	2AAG+2AAA	15.0794
Capitella teleta	1AAG+3AAA	4.92063
Capitella teleta	4AAA	2.85714
Cavia porcellus	4AAG	21.9031
Cavia porcellus	3AAG+1AAA	40.5745
Cavia porcellus	2AAG+2AAA	21.7235
Cavia porcellus	1AAG+3AAA	3.41113
Cavia porcellus	4AAA	0
Chlorocebus sabaeus	4AAG	18.4477
Chlorocebus sabaeus	3AAG+1AAA	31.8335
Chlorocebus sabaeus	2AAG+2AAA	20.4724
Chlorocebus sabaeus	1AAG+3AAA	10.9111
Chlorocebus sabaeus	4AAA	8.88639
Choloepus hoffmanni	4AAG	12.2807
Choloepus hoffmanni	3AAG+1AAA	33.6257
Choloepus hoffmanni	2AAG+2AAA	30.4094
Choloepus hoffmanni	1AAG+3AAA	11.9883
Choloepus hoffmanni	4AAA	0.877193
Ciona intestinalis	4AAG	8.49802
Ciona intestinalis	3AAG+1AAA	35.7708
Ciona intestinalis	2AAG+2AAA	27.8656
Ciona intestinalis	1AAG+3AAA	16.996
Ciona intestinalis	4AAA	0.790514
Ciona savignyi	4AAG	10.1695
Ciona savignyi	3AAG+1AAA	35.9014
Ciona savignyi	2AAG+2AAA	35.7473
Ciona savignyi	1AAG+3AAA	9.86133
Ciona savignyi	4AAA	1.07858
Crassostrea gigas	4AAG	12.7173
Crassostrea gigas	3AAG+1AAA	42.3605
Crassostrea gigas	2AAG+2AAA	24.7941
Crassostrea gigas	1AAG+3AAA	8.23422
Crassostrea gigas	4AAA	0.548948
Culex quinquefasciatus	4AAG	34.2205
Culex quinquefasciatus	3AAG+1AAA	38.403
Culex quinquefasciatus	2AAG+2AAA	15.7795
Culex quinquefasciatus	1AAG+3AAA	2.09125
Culex quinquefasciatus	4AAA	0.760456
Danaus plexippus	4AAG	16.7521
Danaus plexippus	3AAG+1AAA	32.9915
Danaus plexippus	2AAG+2AAA	27.5214
Danaus plexippus	1AAG+3AAA	14.7009
Danaus plexippus	4AAA	1.02564
Danio rerio	4AAG	24.5283
Danio rerio	3AAG+1AAA	42.0644
Danio rerio	2AAG+2AAA	17.0921
Danio rerio	1AAG+3AAA	5.21643
Danio rerio	4AAA	1.22087
Daphnia pulex	4AAG	23.2987
Daphnia pulex	3AAG+1AAA	35.1788
Daphnia pulex	2AAG+2AAA	20.0692
Daphnia pulex	1AAG+3AAA	12.3414
Daphnia pulex	4AAA	2.07612
Dasypus novemcinctus	4AAG	16.2059
Dasypus novemcinctus	3AAG+1AAA	32.9838
Dasypus novemcinctus	2AAG+2AAA	25.7388
Dasypus novemcinctus	1AAG+3AAA	9.81888
Dasypus novemcinctus	4AAA	5.91039
Dendroctonus ponderosae	4AAG	13.6674
Dendroctonus ponderosae	3AAG+1AAA	35.3075
Dendroctonus ponderosae	2AAG+2AAA	34.3964
Dendroctonus ponderosae	1AAG+3AAA	7.0615
Dendroctonus ponderosae	4AAA	0
Dictyostelium discoideum	4AAG	0
Dictyostelium discoideum	3AAG+1AAA	18.0556
Dictyostelium discoideum	2AAG+2AAA	16.6667
Dictyostelium discoideum	1AAG+3AAA	31.9444
Dictyostelium discoideum	4AAA	29.5139
Dipodomys ordii	4AAG	24.0481
Dipodomys ordii	3AAG+1AAA	35.2705
Dipodomys ordii	2AAG+2AAA	23.0461
Dipodomys ordii	1AAG+3AAA	8.01603
Dipodomys ordii	4AAA	0.400802
Drosophila ananassae	4AAG	22.2008
Drosophila ananassae	3AAG+1AAA	38.417
Drosophila ananassae	2AAG+2AAA	20.0772
Drosophila ananassae	1AAG+3AAA	5.01931
Drosophila ananassae	4AAA	0.772201
Drosophila erecta	4AAG	19.5755
Drosophila erecta	3AAG+1AAA	34.1981
Drosophila erecta	2AAG+2AAA	19.3396
Drosophila erecta	1AAG+3AAA	6.60377
Drosophila erecta	4AAA	0.707547
Drosophila grimshawi	4AAG	31.2639
Drosophila grimshawi	3AAG+1AAA	36.5854
Drosophila grimshawi	2AAG+2AAA	21.5078
Drosophila grimshawi	1AAG+3AAA	4.87805
Drosophila grimshawi	4AAA	0.443459
Drosophila melanogaster	4AAG	22.4274
Drosophila melanogaster	3AAG+1AAA	39.5778
Drosophila melanogaster	2AAG+2AAA	12.9288
Drosophila melanogaster	1AAG+3AAA	6.33245
Drosophila melanogaster	4AAA	2.37467
Drosophila mojavensis	4AAG	32.1513
Drosophila mojavensis	3AAG+1AAA	41.1348
Drosophila mojavensis	2AAG+2AAA	15.13
Drosophila mojavensis	1AAG+3AAA	3.78251
Drosophila mojavensis	4AAA	0.945626
Drosophila persimilis	4AAG	26.087
Drosophila persimilis	3AAG+1AAA	34.7826
Drosophila persimilis	2AAG+2AAA	23.7852
Drosophila persimilis	1AAG+3AAA	3.83632
Drosophila persimilis	4AAA	0.511509
Drosophila pseudoobscura	4AAG	28.5088
Drosophila pseudoobscura	3AAG+1AAA	33.9912
Drosophila pseudoobscura	2AAG+2AAA	22.3684
Drosophila pseudoobscura	1AAG+3AAA	4.60526
Drosophila pseudoobscura	4AAA	0.219298
Drosophila sechellia	4AAG	18.543
Drosophila sechellia	3AAG+1AAA	48.1236
Drosophila sechellia	2AAG+2AAA	15.4525
Drosophila sechellia	1AAG+3AAA	5.29801
Drosophila sechellia	4AAA	1.10375
Drosophila simulans	4AAG	22.5201
Drosophila simulans	3AAG+1AAA	39.4102
Drosophila simulans	2AAG+2AAA	15.2815
Drosophila simulans	1AAG+3AAA	3.21716
Drosophila simulans	4AAA	0.80429
Drosophila virilis	4AAG	28.7946
Drosophila virilis	3AAG+1AAA	34.375
Drosophila virilis	2AAG+2AAA	20.7589
Drosophila virilis	1AAG+3AAA	5.58036
Drosophila virilis	4AAA	2.23214
Drosophila willistoni	4AAG	16.2228
Drosophila willistoni	3AAG+1AAA	37.5303
Drosophila willistoni	2AAG+2AAA	26.3923
Drosophila willistoni	1AAG+3AAA	5.56901
Drosophila willistoni	4AAA	0.484262
Drosophila yakuba	4AAG	20.3837
Drosophila yakuba	3AAG+1AAA	40.7674
Drosophila yakuba	2AAG+2AAA	17.9856
Drosophila yakuba	1AAG+3AAA	6.71463
Drosophila yakuba	4AAA	0.959233
Echinops telfairi	4AAG	22.5738
Echinops telfairi	3AAG+1AAA	31.2236
Echinops telfairi	2AAG+2AAA	22.1519
Echinops telfairi	1AAG+3AAA	8.22785
Echinops telfairi	4AAA	2.1097
Emiliania huxleyi	4AAG	91.8367
Emiliania huxleyi	3AAG+1AAA	6.12245
Emiliania huxleyi	2AAG+2AAA	1.36054
Emiliania huxleyi	1AAG+3AAA	0.680272
Emiliania huxleyi	4AAA	0
Entamoeba histolytica	4AAG	0.84507
Entamoeba histolytica	3AAG+1AAA	34.0845
Entamoeba histolytica	2AAG+2AAA	26.7606
Entamoeba histolytica	1AAG+3AAA	33.8028
Entamoeba histolytica	4AAA	0.28169
Equus caballus	4AAG	20.4038
Equus caballus	3AAG+1AAA	36.3443
Equus caballus	2AAG+2AAA	21.8916
Equus caballus	1AAG+3AAA	9.45802
Equus caballus	4AAA	2.76302
Erinaceus europaeus	4AAG	17.381
Erinaceus europaeus	3AAG+1AAA	34.7619
Erinaceus europaeus	2AAG+2AAA	25.2381
Erinaceus europaeus	1AAG+3AAA	10.4762
Erinaceus europaeus	4AAA	2.38095
Felis catus	4AAG	18.3599
Felis catus	3AAG+1AAA	36.5973
Felis catus	2AAG+2AAA	22.5214
Felis catus	1AAG+3AAA	7.09914
Felis catus	4AAA	3.54957
Ficedula albicollis	4AAG	20.8386
Ficedula albicollis	3AAG+1AAA	31.5121
Ficedula albicollis	2AAG+2AAA	25.7942
Ficedula albicollis	1AAG+3AAA	9.4028
Ficedula albicollis	4AAA	3.93901
Gadus morhua	4AAG	52.8428
Gadus morhua	3AAG+1AAA	25.2508
Gadus morhua	2AAG+2AAA	7.52508
Gadus morhua	1AAG+3AAA	2.50836
Gadus morhua	4AAA	0.501672
Gallus gallus	4AAG	20.7944
Gallus gallus	3AAG+1AAA	35.2804
Gallus gallus	2AAG+2AAA	20.9112
Gallus gallus	1AAG+3AAA	9.57944
Gallus gallus	4AAA	4.55607
Gasterosteus aculeatus	4AAG	33.8608
Gasterosteus aculeatus	3AAG+1AAA	36.4979
Gasterosteus aculeatus	2AAG+2AAA	12.8692
Gasterosteus aculeatus	1AAG+3AAA	4.32489
Gasterosteus aculeatus	4AAA	4.11392
Gorilla gorilla	4AAG	17.6904
Gorilla gorilla	3AAG+1AAA	30.8763
Gorilla gorilla	2AAG+2AAA	21.4578
Gorilla gorilla	1AAG+3AAA	10.8927
Gorilla gorilla	4AAA	6.96151
Guillardia theta	4AAG	62.5259
Guillardia theta	3AAG+1AAA	27.5362
Guillardia theta	2AAG+2AAA	3.93375
Guillardia theta	1AAG+3AAA	0.828157
Guillardia theta	4AAA	0.207039
Heliconius melpomene	4AAG	7.53296
Heliconius melpomene	3AAG+1AAA	30.6968
Heliconius melpomene	2AAG+2AAA	35.2166
Heliconius melpomene	1AAG+3AAA	20.339
Heliconius melpomene	4AAA	0.564972
Helobdella robusta	4AAG	22.1463
Helobdella robusta	3AAG+1AAA	29.7561
Helobdella robusta	2AAG+2AAA	24.9756
Helobdella robusta	1AAG+3AAA	15.4146
Helobdella robusta	4AAA	1.95122
Homo sapiens	4AAG	20.3015
Homo sapiens	3AAG+1AAA	31.3568
Homo sapiens	2AAG+2AAA	23.4171
Homo sapiens	1AAG+3AAA	10.0503
Homo sapiens	4AAA	0.80402
Hyaloperonospora arabidopsidis	4AAG	42.1405
Hyaloperonospora arabidopsidis	3AAG+1AAA	36.7893
Hyaloperonospora arabidopsidis	2AAG+2AAA	12.3746
Hyaloperonospora arabidopsidis	1AAG+3AAA	1.00334
Hyaloperonospora arabidopsidis	4AAA	1.67224
Ictidomys tridecemlineatus	4AAG	20.8625
Ictidomys tridecemlineatus	3AAG+1AAA	29.021
Ictidomys tridecemlineatus	2AAG+2AAA	24.2424
Ictidomys tridecemlineatus	1AAG+3AAA	10.1399
Ictidomys tridecemlineatus	4AAA	5.12821
Ixodes scapularis	4AAG	20.6897
Ixodes scapularis	3AAG+1AAA	20.4433
Ixodes scapularis	2AAG+2AAA	13.7931
Ixodes scapularis	1AAG+3AAA	13.7931
Ixodes scapularis	4AAA	23.1527
Latimeria chalumnae	4AAG	7.90306
Latimeria chalumnae	3AAG+1AAA	22.6027
Latimeria chalumnae	2AAG+2AAA	15.7007
Latimeria chalumnae	1AAG+3AAA	12.118
Latimeria chalumnae	4AAA	35.9326
Lepisosteus oculatus	4AAG	26.1261
Lepisosteus oculatus	3AAG+1AAA	42.6126
Lepisosteus oculatus	2AAG+2AAA	16.5766
Lepisosteus oculatus	1AAG+3AAA	3.6036
Lepisosteus oculatus	4AAA	0.990991
Loa loa	4AAG	5.36913
Loa loa	3AAG+1AAA	25.1678
Loa loa	2AAG+2AAA	36.5772
Loa loa	1AAG+3AAA	21.1409
Loa loa	4AAA	5.7047
Lottia gigantea	4AAG	7.02703
Lottia gigantea	3AAG+1AAA	41.4865
Lottia gigantea	2AAG+2AAA	33.1081
Lottia gigantea	1AAG+3AAA	10.2703
Lottia gigantea	4AAA	0.810811
Loxodonta africana	4AAG	19.0833
Loxodonta africana	3AAG+1AAA	32.6473
Loxodonta africana	2AAG+2AAA	23.1993
Loxodonta africana	1AAG+3AAA	8.69972
Loxodonta africana	4AAA	6.36109
Macaca mulatta	4AAG	19.7431
Macaca mulatta	3AAG+1AAA	31.0345
Macaca mulatta	2AAG+2AAA	19.405
Macaca mulatta	1AAG+3AAA	10.5477
Macaca mulatta	4AAA	10.2772
Macropus eugenii	4AAG	16.9725
Macropus eugenii	3AAG+1AAA	36.4679
Macropus eugenii	2AAG+2AAA	27.2936
Macropus eugenii	1AAG+3AAA	10.7798
Macropus eugenii	4AAA	0.458716
Megaselia scalaris	4AAG	3.43137
Megaselia scalaris	3AAG+1AAA	48.5294
Megaselia scalaris	2AAG+2AAA	30.3922
Megaselia scalaris	1AAG+3AAA	5.88235
Megaselia scalaris	4AAA	1.47059
Meleagris gallopavo	4AAG	15.7005
Meleagris gallopavo	3AAG+1AAA	33.2126
Meleagris gallopavo	2AAG+2AAA	23.0676
Meleagris gallopavo	1AAG+3AAA	12.8019
Meleagris gallopavo	4AAA	5.7971
Melitaea cinxia	4AAG	7.21649
Melitaea cinxia	3AAG+1AAA	34.2268
Melitaea cinxia	2AAG+2AAA	27.4227
Melitaea cinxia	1AAG+3AAA	17.5258
Melitaea cinxia	4AAA	3.71134
Microcebus murinus	4AAG	20.2479
Microcebus murinus	3AAG+1AAA	35.9504
Microcebus murinus	2AAG+2AAA	21.9008
Microcebus murinus	1AAG+3AAA	9.09091
Microcebus murinus	4AAA	1.23967
Mnemiopsis leidyi	4AAG	18.2667
Mnemiopsis leidyi	3AAG+1AAA	38.8
Mnemiopsis leidyi	2AAG+2AAA	25.8667
Mnemiopsis leidyi	1AAG+3AAA	4.93333
Mnemiopsis leidyi	4AAA	0
Monodelphis domestica	4AAG	18.0022
Monodelphis domestica	3AAG+1AAA	34.4676
Monodelphis domestica	2AAG+2AAA	26.674
Monodelphis domestica	1AAG+3AAA	10.6476
Monodelphis domestica	4AAA	1.31723
Mus musculus	4AAG	24.3532
Mus musculus	3AAG+1AAA	36.8954
Mus musculus	2AAG+2AAA	20.0787
Mus musculus	1AAG+3AAA	6.13048
Mus musculus	4AAA	0.674916
Mustela putorius furo	4AAG	20.4595
Mustela putorius furo	3AAG+1AAA	31.1816
Mustela putorius furo	2AAG+2AAA	21.4442
Mustela putorius furo	1AAG+3AAA	9.95624
Mustela putorius furo	4AAA	7.22101
Myotis lucifugus	4AAG	17.9054
Myotis lucifugus	3AAG+1AAA	34.6847
Myotis lucifugus	2AAG+2AAA	23.0856
Myotis lucifugus	1AAG+3AAA	9.68468
Myotis lucifugus	4AAA	2.59009
Nasonia vitripennis	4AAG	18.3463
Nasonia vitripennis	3AAG+1AAA	34.7545
Nasonia vitripennis	2AAG+2AAA	22.4806
Nasonia vitripennis	1AAG+3AAA	14.0827
Nasonia vitripennis	4AAA	3.10078
Nematostella vectensis	4AAG	8.78244
Nematostella vectensis	3AAG+1AAA	37.9242
Nematostella vectensis	2AAG+2AAA	36.3273
Nematostella vectensis	1AAG+3AAA	7.18563
Nematostella vectensis	4AAA	0.199601
Nomascus leucogenys	4AAG	17.7419
Nomascus leucogenys	3AAG+1AAA	33.5253
Nomascus leucogenys	2AAG+2AAA	22.235
Nomascus leucogenys	1AAG+3AAA	10.3687
Nomascus leucogenys	4AAA	5.87558
Ochotona princeps	4AAG	22.547
Ochotona princeps	3AAG+1AAA	39.4572
Ochotona princeps	2AAG+2AAA	19.6242
Ochotona princeps	1AAG+3AAA	6.88935
Ochotona princeps	4AAA	0.626305
Onchocerca volvulus	4AAG	4.78589
Onchocerca volvulus	3AAG+1AAA	19.8992
Onchocerca volvulus	2AAG+2AAA	34.5088
Onchocerca volvulus	1AAG+3AAA	27.7078
Onchocerca volvulus	4AAA	10.0756
Oreochromis niloticus	4AAG	25.6291
Oreochromis niloticus	3AAG+1AAA	34.5695
Oreochromis niloticus	2AAG+2AAA	18.4106
Oreochromis niloticus	1AAG+3AAA	5.56291
Oreochromis niloticus	4AAA	4.96689
Ornithorhynchus anatinus	4AAG	19.7037
Ornithorhynchus anatinus	3AAG+1AAA	38.3704
Ornithorhynchus anatinus	2AAG+2AAA	21.1852
Ornithorhynchus anatinus	1AAG+3AAA	8.14815
Ornithorhynchus anatinus	4AAA	4
Oryctolagus cuniculus	4AAG	25.4079
Oryctolagus cuniculus	3AAG+1AAA	33.1002
Oryctolagus cuniculus	2AAG+2AAA	19.9301
Oryctolagus cuniculus	1AAG+3AAA	8.50816
Oryctolagus cuniculus	4AAA	4.1958
Oryzias latipes	4AAG	23.382
Oryzias latipes	3AAG+1AAA	34.1336
Oryzias latipes	2AAG+2AAA	17.3278
Oryzias latipes	1AAG+3AAA	6.05428
Oryzias latipes	4AAA	7.41127
Otolemur garnettii	4AAG	16.3902
Otolemur garnettii	3AAG+1AAA	29.7561
Otolemur garnettii	2AAG+2AAA	22.3415
Otolemur garnettii	1AAG+3AAA	10.0488
Otolemur garnettii	4AAA	9.56098
Ovis aries	4AAG	23.023
Ovis aries	3AAG+1AAA	28.4284
Ovis aries	2AAG+2AAA	24.024
Ovis aries	1AAG+3AAA	8.10811
Ovis aries	4AAA	2.6026
Pan troglodytes	4AAG	18.4615
Pan troglodytes	3AAG+1AAA	34.6154
Pan troglodytes	2AAG+2AAA	22.6923
Pan troglodytes	1AAG+3AAA	10.8974
Pan troglodytes	4AAA	1.79487
Papio anubis	4AAG	22.5768
Papio anubis	3AAG+1AAA	36.4066
Papio anubis	2AAG+2AAA	22.2222
Papio anubis	1AAG+3AAA	6.61939
Papio anubis	4AAA	1.30024
Paramecium tetraurelia	4AAG	8.0749
Paramecium tetraurelia	3AAG+1AAA	25.512
Paramecium tetraurelia	2AAG+2AAA	29.842
Paramecium tetraurelia	1AAG+3AAA	25.8046
Paramecium tetraurelia	4AAA	5.14921
Pediculus humanus	4AAG	1.57171
Pediculus humanus	3AAG+1AAA	9.13556
Pediculus humanus	2AAG+2AAA	15.2259
Pediculus humanus	1AAG+3AAA	44.2043
Pediculus humanus	4AAA	28.5855
Pelodiscus sinensis	4AAG	16.9325
Pelodiscus sinensis	3AAG+1AAA	33.9877
Pelodiscus sinensis	2AAG+2AAA	28.7117
Pelodiscus sinensis	1AAG+3AAA	8.34356
Pelodiscus sinensis	4AAA	1.71779
Petromyzon marinus	4AAG	27.6451
Petromyzon marinus	3AAG+1AAA	41.2969
Petromyzon marinus	2AAG+2AAA	15.0171
Petromyzon marinus	1AAG+3AAA	6.48464
Petromyzon marinus	4AAA	1.02389
Phaeodactylum tricornutum	4AAG	6.77419
Phaeodactylum tricornutum	3AAG+1AAA	38.3871
Phaeodactylum tricornutum	2AAG+2AAA	37.0968
Phaeodactylum tricornutum	1AAG+3AAA	6.77419
Phaeodactylum tricornutum	4AAA	0.322581
Phytophthora infestans	4AAG	29.8569
Phytophthora infestans	3AAG+1AAA	52.7607
Phytophthora infestans	2AAG+2AAA	12.0654
Phytophthora infestans	1AAG+3AAA	0.817996
Phytophthora infestans	4AAA	0.204499
Phytophthora kernoviae	4AAG	33.6842
Phytophthora kernoviae	3AAG+1AAA	45.614
Phytophthora kernoviae	2AAG+2AAA	14.0351
Phytophthora kernoviae	1AAG+3AAA	1.40351
Phytophthora kernoviae	4AAA	0
Phytophthora lateralis	4AAG	42.7711
Phytophthora lateralis	3AAG+1AAA	41.8675
Phytophthora lateralis	2AAG+2AAA	8.73494
Phytophthora lateralis	1AAG+3AAA	0.903614
Phytophthora lateralis	4AAA	0
Phytophthora parasitica	4AAG	29.6526
Phytophthora parasitica	3AAG+1AAA	48.5112
Phytophthora parasitica	2AAG+2AAA	13.3995
Phytophthora parasitica	1AAG+3AAA	1.86104
Phytophthora parasitica	4AAA	0.868486
Phytophthora ramorum	4AAG	44.7942
Phytophthora ramorum	3AAG+1AAA	41.6465
Phytophthora ramorum	2AAG+2AAA	7.50605
Phytophthora ramorum	1AAG+3AAA	0.968523
Phytophthora ramorum	4AAA	0
Phytophthora sojae	4AAG	60.5528
Phytophthora sojae	3AAG+1AAA	29.2714
Phytophthora sojae	2AAG+2AAA	5.65327
Phytophthora sojae	1AAG+3AAA	0.125628
Phytophthora sojae	4AAA	0
Plasmodium berghei	4AAG	0.0722804
Plasmodium berghei	3AAG+1AAA	1.91543
Plasmodium berghei	2AAG+2AAA	5.89086
Plasmodium berghei	1AAG+3AAA	19.3712
Plasmodium berghei	4AAA	72.6419
Plasmodium chabaudi	4AAG	0.0877578
Plasmodium chabaudi	3AAG+1AAA	2.19394
Plasmodium chabaudi	2AAG+2AAA	8.02984
Plasmodium chabaudi	1AAG+3AAA	29.0917
Plasmodium chabaudi	4AAA	60.4651
Plasmodium falciparum	4AAG	1.10523
Plasmodium falciparum	3AAG+1AAA	5.66429
Plasmodium falciparum	2AAG+2AAA	12.595
Plasmodium falciparum	1AAG+3AAA	29.2885
Plasmodium falciparum	4AAA	50.7483
Plasmodium knowlesi	4AAG	4.73426
Plasmodium knowlesi	3AAG+1AAA	12.0143
Plasmodium knowlesi	2AAG+2AAA	18.6244
Plasmodium knowlesi	1AAG+3AAA	22.2421
Plasmodium knowlesi	4AAA	40.2412
Plasmodium vivax	4AAG	7.19132
Plasmodium vivax	3AAG+1AAA	16.9607
Plasmodium vivax	2AAG+2AAA	16.1918
Plasmodium vivax	1AAG+3AAA	19.1768
Plasmodium vivax	4AAA	38.6703
Poecilia formosa	4AAG	36.45
Poecilia formosa	3AAG+1AAA	35.5004
Poecilia formosa	2AAG+2AAA	17.0928
Poecilia formosa	1AAG+3AAA	4.23667
Poecilia formosa	4AAA	0.511322
Pongo abelii	4AAG	16.9511
Pongo abelii	3AAG+1AAA	34.3572
Pongo abelii	2AAG+2AAA	21.0466
Pongo abelii	1AAG+3AAA	9.78385
Pongo abelii	4AAA	3.41297
Pristionchus pacificus	4AAG	48.8914
Pristionchus pacificus	3AAG+1AAA	34.8115
Pristionchus pacificus	2AAG+2AAA	5.6541
Pristionchus pacificus	1AAG+3AAA	0.997783
Pristionchus pacificus	4AAA	0.443459
Procavia capensis	4AAG	19.9179
Procavia capensis	3AAG+1AAA	36.5503
Procavia capensis	2AAG+2AAA	23.4086
Procavia capensis	1AAG+3AAA	10.6776
Procavia capensis	4AAA	0.410678
Pteropus vampyrus	4AAG	22.0155
Pteropus vampyrus	3AAG+1AAA	36.124
Pteropus vampyrus	2AAG+2AAA	21.8605
Pteropus vampyrus	1AAG+3AAA	9.45736
Pteropus vampyrus	4AAA	0.775194
Pythium aphanidermatum	4AAG	57.2581
Pythium aphanidermatum	3AAG+1AAA	34.1398
Pythium aphanidermatum	2AAG+2AAA	4.30108
Pythium aphanidermatum	1AAG+3AAA	0.268817
Pythium aphanidermatum	4AAA	0
Pythium arrhenomanes	4AAG	55.9889
Pythium arrhenomanes	3AAG+1AAA	32.0334
Pythium arrhenomanes	2AAG+2AAA	5.84958
Pythium arrhenomanes	1AAG+3AAA	0.278552
Pythium arrhenomanes	4AAA	0.278552
Pythium irregulare	4AAG	48.7805
Pythium irregulare	3AAG+1AAA	39.8955
Pythium irregulare	2AAG+2AAA	6.96864
Pythium irregulare	1AAG+3AAA	0.522648
Pythium irregulare	4AAA	0
Pythium iwayamai	4AAG	57.9158
Pythium iwayamai	3AAG+1AAA	32.2645
Pythium iwayamai	2AAG+2AAA	5.01002
Pythium iwayamai	1AAG+3AAA	0.601202
Pythium iwayamai	4AAA	0
Pythium ultimum	4AAG	41.8033
Pythium ultimum	3AAG+1AAA	37.7049
Pythium ultimum	2AAG+2AAA	12.7049
Pythium ultimum	1AAG+3AAA	1.43443
Pythium ultimum	4AAA	0
Pythium vexans	4AAG	78.7582
Pythium vexans	3AAG+1AAA	17.6471
Pythium vexans	2AAG+2AAA	0.980392
Pythium vexans	1AAG+3AAA	0.326797
Pythium vexans	4AAA	0
Rattus norvegicus	4AAG	23.6842
Rattus norvegicus	3AAG+1AAA	37.931
Rattus norvegicus	2AAG+2AAA	16.8784
Rattus norvegicus	1AAG+3AAA	6.07985
Rattus norvegicus	4AAA	3.902
Rhodnius prolixus	4AAG	17.2542
Rhodnius prolixus	3AAG+1AAA	24.8609
Rhodnius prolixus	2AAG+2AAA	22.449
Rhodnius prolixus	1AAG+3AAA	23.1911
Rhodnius prolixus	4AAA	3.71058
Saccharomyces cerevisiae	4AAG	9.16031
Saccharomyces cerevisiae	3AAG+1AAA	35.8779
Saccharomyces cerevisiae	2AAG+2AAA	21.374
Saccharomyces cerevisiae	1AAG+3AAA	16.4122
Saccharomyces cerevisiae	4AAA	8.39695
Sarcophilus harrisii	4AAG	14.9398
Sarcophilus harrisii	3AAG+1AAA	28.8353
Sarcophilus harrisii	2AAG+2AAA	24.0964
Sarcophilus harrisii	1AAG+3AAA	10.7631
Sarcophilus harrisii	4AAA	14.4578
Schistosoma mansoni	4AAG	3.42857
Schistosoma mansoni	3AAG+1AAA	26.8571
Schistosoma mansoni	2AAG+2AAA	40
Schistosoma mansoni	1AAG+3AAA	22.2857
Schistosoma mansoni	4AAA	0
Solenopsis invicta	4AAG	12.115
Solenopsis invicta	3AAG+1AAA	35.729
Solenopsis invicta	2AAG+2AAA	26.4887
Solenopsis invicta	1AAG+3AAA	15.1951
Solenopsis invicta	4AAA	2.25873
Sorex araneus	4AAG	18.0371
Sorex araneus	3AAG+1AAA	38.4615
Sorex araneus	2AAG+2AAA	25.4642
Sorex araneus	1AAG+3AAA	7.95756
Sorex araneus	4AAA	0.530504
Strigamia maritima	4AAG	6.66667
Strigamia maritima	3AAG+1AAA	32.5203
Strigamia maritima	2AAG+2AAA	32.5203
Strigamia maritima	1AAG+3AAA	15.6098
Strigamia maritima	4AAA	5.20325
Strongylocentrotus purpuratus	4AAG	31.8922
Strongylocentrotus purpuratus	3AAG+1AAA	41.3534
Strongylocentrotus purpuratus	2AAG+2AAA	15.1629
Strongylocentrotus purpuratus	1AAG+3AAA	2.06767
Strongylocentrotus purpuratus	4AAA	1.81704
Sus scrofa	4AAG	18.7683
Sus scrofa	3AAG+1AAA	30.303
Sus scrofa	2AAG+2AAA	21.7986
Sus scrofa	1AAG+3AAA	7.33138
Sus scrofa	4AAA	12.4145
Taeniopygia guttata	4AAG	18.4739
Taeniopygia guttata	3AAG+1AAA	33.6011
Taeniopygia guttata	2AAG+2AAA	25.1673
Taeniopygia guttata	1AAG+3AAA	10.8434
Taeniopygia guttata	4AAA	4.68541
Takifugu rubripes	4AAG	25.8913
Takifugu rubripes	3AAG+1AAA	34.253
Takifugu rubripes	2AAG+2AAA	19.652
Takifugu rubripes	1AAG+3AAA	5.85739
Takifugu rubripes	4AAA	4.5416
Tarsius syrichta	4AAG	10.1732
Tarsius syrichta	3AAG+1AAA	37.8788
Tarsius syrichta	2AAG+2AAA	30.9524
Tarsius syrichta	1AAG+3AAA	11.2554
Tarsius syrichta	4AAA	0.865801
Tetrahymena thermophila	4AAG	2.53723
Tetrahymena thermophila	3AAG+1AAA	21.0149
Tetrahymena thermophila	2AAG+2AAA	32.1015
Tetrahymena thermophila	1AAG+3AAA	36.1831
Tetrahymena thermophila	4AAA	5.12962
Tetranychus urticae	4AAG	6.50888
Tetranychus urticae	3AAG+1AAA	42.3077
Tetranychus urticae	2AAG+2AAA	31.6568
Tetranychus urticae	1AAG+3AAA	9.76331
Tetranychus urticae	4AAA	0.295858
Tetraodon nigroviridis	4AAG	28.6925
Tetraodon nigroviridis	3AAG+1AAA	33.5351
Tetraodon nigroviridis	2AAG+2AAA	17.9177
Tetraodon nigroviridis	1AAG+3AAA	6.6586
Tetraodon nigroviridis	4AAA	7.62712
Thalassiosira pseudonana	4AAG	34.5733
Thalassiosira pseudonana	3AAG+1AAA	44.4201
Thalassiosira pseudonana	2AAG+2AAA	11.3786
Thalassiosira pseudonana	1AAG+3AAA	0.437637
Thalassiosira pseudonana	4AAA	0.218818
Toxoplasma gondii	4AAG	38.6059
Toxoplasma gondii	3AAG+1AAA	31.3673
Toxoplasma gondii	2AAG+2AAA	13.4048
Toxoplasma gondii	1AAG+3AAA	2.68097
Toxoplasma gondii	4AAA	0.268097
Tribolium castaneum	4AAG	20.0272
Tribolium castaneum	3AAG+1AAA	38.2834
Tribolium castaneum	2AAG+2AAA	24.6594
Tribolium castaneum	1AAG+3AAA	9.40054
Tribolium castaneum	4AAA	1.08992
Trichinella spiralis	4AAG	20.3883
Trichinella spiralis	3AAG+1AAA	26.5372
Trichinella spiralis	2AAG+2AAA	23.9482
Trichinella spiralis	1AAG+3AAA	19.4175
Trichinella spiralis	4AAA	0.970874
Trichoplax adhaerens	4AAG	4.29799
Trichoplax adhaerens	3AAG+1AAA	32.3782
Trichoplax adhaerens	2AAG+2AAA	35.5301
Trichoplax adhaerens	1AAG+3AAA	19.7708
Trichoplax adhaerens	4AAA	0.859599
Trypanosoma brucei	4AAG	3.53535
Trypanosoma brucei	3AAG+1AAA	11.6162
Trypanosoma brucei	2AAG+2AAA	15.6566
Trypanosoma brucei	1AAG+3AAA	17.1717
Trypanosoma brucei	4AAA	8.58586
Tupaia belangeri	4AAG	17.1558
Tupaia belangeri	3AAG+1AAA	32.2799
Tupaia belangeri	2AAG+2AAA	27.7652
Tupaia belangeri	1AAG+3AAA	10.158
Tupaia belangeri	4AAA	1.12867
Tursiops truncatus	4AAG	18.9441
Tursiops truncatus	3AAG+1AAA	37.1118
Tursiops truncatus	2AAG+2AAA	24.6894
Tursiops truncatus	1AAG+3AAA	7.29814
Tursiops truncatus	4AAA	0.465839
Vicugna pacos	4AAG	13.5802
Vicugna pacos	3AAG+1AAA	38.0247
Vicugna pacos	2AAG+2AAA	27.4074
Vicugna pacos	1AAG+3AAA	11.1111
Vicugna pacos	4AAA	1.7284
Xenopus tropicalis	4AAG	10.1156
Xenopus tropicalis	3AAG+1AAA	36.1272
Xenopus tropicalis	2AAG+2AAA	27.264
Xenopus tropicalis	1AAG+3AAA	11.4644
Xenopus tropicalis	4AAA	4.4316
Xiphophorus maculatus	4AAG	33.8418
Xiphophorus maculatus	3AAG+1AAA	34.5091
Xiphophorus maculatus	2AAG+2AAA	16.0153
Xiphophorus maculatus	1AAG+3AAA	6.76835
Xiphophorus maculatus	4AAA	1.62059
Zootermopsis nevadensis	4AAG	26.1603
Zootermopsis nevadensis	3AAG+1AAA	38.1857
Zootermopsis nevadensis	2AAG+2AAA	22.5738
Zootermopsis nevadensis	1AAG+3AAA	2.53165
Zootermopsis nevadensis	4AAA	0.632911

## Sheet: Source data Figure 1B
Number of As	H. sapiens Counts	T. thermophila Counts	P. falciparum Counts
6	516	2192	1760
7	415	2882	2103
8	301	2786	2415
9	209	1700	2117
10	94	1048	2462
11	77	364	1555
12	11	86	774
13	4	49	544
14	3	21	367
15	2	14	269
16	1	2	206
17	1	1	168
18	1	0	112
19	1	0	81
20	1	0	89
21	0	0	42
22	0	0	54
23	1	0	46
24	0	0	36
25	0	0	20
26	0	0	19
27	0	0	17
28	0	0	13
29	0	0	13
30	0	0	11
31	1	0	6
32	0	0	3
33	0	0	1
34	0	0	2
35	0	0	1
36	0	0	3
37	0	0	0
38	0	0	1
39	0	0	1
40	0	0	1
42	0	0	1
65	0	0	1

## Sheet: Source data Figure 1C
Organism	LysCodonPat	Value
Acyrthosiphon pisum	4AAG	3.83795
Acyrthosiphon pisum	3AAG+1AAA	12.2957
Acyrthosiphon pisum	2AAG+2AAA	20.9666
Acyrthosiphon pisum	1AAG+3AAA	35.7498
Acyrthosiphon pisum	4AAA	24.3781
Ailuropoda melanoleuca	4AAG	15.7428
Ailuropoda melanoleuca	3AAG+1AAA	37.694
Ailuropoda melanoleuca	2AAG+2AAA	21.5078
Ailuropoda melanoleuca	1AAG+3AAA	9.53437
Ailuropoda melanoleuca	4AAA	5.6541
Amphimedon queenslandica	4AAG	11.7569
Amphimedon queenslandica	3AAG+1AAA	33.8177
Amphimedon queenslandica	2AAG+2AAA	34.0819
Amphimedon queenslandica	1AAG+3AAA	10.4359
Amphimedon queenslandica	4AAA	1.4531
Anas platyrhynchos	4AAG	16.7358
Anas platyrhynchos	3AAG+1AAA	30.1521
Anas platyrhynchos	2AAG+2AAA	23.9281
Anas platyrhynchos	1AAG+3AAA	12.1715
Anas platyrhynchos	4AAA	10.0968
Anolis carolinensis	4AAG	20.8038
Anolis carolinensis	3AAG+1AAA	36.7612
Anolis carolinensis	2AAG+2AAA	23.9953
Anolis carolinensis	1AAG+3AAA	7.56501
Anolis carolinensis	4AAA	1.65485
Anopheles darlingi	4AAG	29.2754
Anopheles darlingi	3AAG+1AAA	38.8406
Anopheles darlingi	2AAG+2AAA	17.971
Anopheles darlingi	1AAG+3AAA	3.47826
Anopheles darlingi	4AAA	0
Anopheles gambiae	4AAG	27.1347
Anopheles gambiae	3AAG+1AAA	49.5256
Anopheles gambiae	2AAG+2AAA	14.4213
Anopheles gambiae	1AAG+3AAA	1.89753
Anopheles gambiae	4AAA	0.948767
Apis mellifera	4AAG	9.53678
Apis mellifera	3AAG+1AAA	28.7466
Apis mellifera	2AAG+2AAA	19.0736
Apis mellifera	1AAG+3AAA	33.6512
Apis mellifera	4AAA	5.99455
Astyanax mexicanus	4AAG	25.4917
Astyanax mexicanus	3AAG+1AAA	36.9788
Astyanax mexicanus	2AAG+2AAA	13.1393
Astyanax mexicanus	1AAG+3AAA	5.66483
Astyanax mexicanus	4AAA	8.18253
Atta cephalotes	4AAG	17.2581
Atta cephalotes	3AAG+1AAA	33.3871
Atta cephalotes	2AAG+2AAA	26.7742
Atta cephalotes	1AAG+3AAA	13.871
Atta cephalotes	4AAA	1.93548
Bigelowiella natans	4AAG	44.1729
Bigelowiella natans	3AAG+1AAA	30.8271
Bigelowiella natans	2AAG+2AAA	12.594
Bigelowiella natans	1AAG+3AAA	5.26316
Bigelowiella natans	4AAA	0.902256
Bombyx mori	4AAG	10.0193
Bombyx mori	3AAG+1AAA	33.7187
Bombyx mori	2AAG+2AAA	33.3333
Bombyx mori	1AAG+3AAA	15.6069
Bombyx mori	4AAA	0.385356
Bos taurus	4AAG	24.052
Bos taurus	3AAG+1AAA	29.2524
Bos taurus	2AAG+2AAA	23.8353
Bos taurus	1AAG+3AAA	8.23402
Bos taurus	4AAA	4.00867
Brugia malayi	4AAG	3.91061
Brugia malayi	3AAG+1AAA	25.8845
Brugia malayi	2AAG+2AAA	23.0912
Brugia malayi	1AAG+3AAA	27.3743
Brugia malayi	4AAA	14.7114
Caenorhabditis brenneri	4AAG	20.2604
Caenorhabditis brenneri	3AAG+1AAA	38.6493
Caenorhabditis brenneri	2AAG+2AAA	20.9927
Caenorhabditis brenneri	1AAG+3AAA	6.99756
Caenorhabditis brenneri	4AAA	0.488202
Caenorhabditis briggsae	4AAG	30.6434
Caenorhabditis briggsae	3AAG+1AAA	33.9149
Caenorhabditis briggsae	2AAG+2AAA	18.8659
Caenorhabditis briggsae	1AAG+3AAA	6.10687
Caenorhabditis briggsae	4AAA	0.545256
Caenorhabditis elegans	4AAG	20.463
Caenorhabditis elegans	3AAG+1AAA	35.8333
Caenorhabditis elegans	2AAG+2AAA	22.5926
Caenorhabditis elegans	1AAG+3AAA	7.31481
Caenorhabditis elegans	4AAA	0.185185
Caenorhabditis japonica	4AAG	20.9479
Caenorhabditis japonica	3AAG+1AAA	36.6825
Caenorhabditis japonica	2AAG+2AAA	16.2085
Caenorhabditis japonica	1AAG+3AAA	5.21327
Caenorhabditis japonica	4AAA	0.947867
Caenorhabditis remanei	4AAG	20.0159
Caenorhabditis remanei	3AAG+1AAA	38.5167
Caenorhabditis remanei	2AAG+2AAA	26.4753
Caenorhabditis remanei	1AAG+3AAA	5.18341
Caenorhabditis remanei	4AAA	0.797448
Callithrix jacchus	4AAG	19.3248
Callithrix jacchus	3AAG+1AAA	36.0303
Callithrix jacchus	2AAG+2AAA	21.0128
Callithrix jacchus	1AAG+3AAA	10.0116
Callithrix jacchus	4AAA	3.60885
Canis familiaris	4AAG	19.8113
Canis familiaris	3AAG+1AAA	32.5472
Canis familiaris	2AAG+2AAA	21.3836
Canis familiaris	1AAG+3AAA	10.456
Canis familiaris	4AAA	5.73899
Capitella teleta	4AAG	29.9206
Capitella teleta	3AAG+1AAA	33.9683
Capitella teleta	2AAG+2AAA	15.0794
Capitella teleta	1AAG+3AAA	4.92063
Capitella teleta	4AAA	2.85714
Cavia porcellus	4AAG	21.9031
Cavia porcellus	3AAG+1AAA	40.5745
Cavia porcellus	2AAG+2AAA	21.7235
Cavia porcellus	1AAG+3AAA	3.41113
Cavia porcellus	4AAA	0
Chlorocebus sabaeus	4AAG	18.4477
Chlorocebus sabaeus	3AAG+1AAA	31.8335
Chlorocebus sabaeus	2AAG+2AAA	20.4724
Chlorocebus sabaeus	1AAG+3AAA	10.9111
Chlorocebus sabaeus	4AAA	8.88639
Choloepus hoffmanni	4AAG	12.2807
Choloepus hoffmanni	3AAG+1AAA	33.6257
Choloepus hoffmanni	2AAG+2AAA	30.4094
Choloepus hoffmanni	1AAG+3AAA	11.9883
Choloepus hoffmanni	4AAA	0.877193
Ciona intestinalis	4AAG	8.49802
Ciona intestinalis	3AAG+1AAA	35.7708
Ciona intestinalis	2AAG+2AAA	27.8656
Ciona intestinalis	1AAG+3AAA	16.996
Ciona intestinalis	4AAA	0.790514
Ciona savignyi	4AAG	10.1695
Ciona savignyi	3AAG+1AAA	35.9014
Ciona savignyi	2AAG+2AAA	35.7473
Ciona savignyi	1AAG+3AAA	9.86133
Ciona savignyi	4AAA	1.07858
Crassostrea gigas	4AAG	12.7173
Crassostrea gigas	3AAG+1AAA	42.3605
Crassostrea gigas	2AAG+2AAA	24.7941
Crassostrea gigas	1AAG+3AAA	8.23422
Crassostrea gigas	4AAA	0.548948
Culex quinquefasciatus	4AAG	34.2205
Culex quinquefasciatus	3AAG+1AAA	38.403
Culex quinquefasciatus	2AAG+2AAA	15.7795
Culex quinquefasciatus	1AAG+3AAA	2.09125
Culex quinquefasciatus	4AAA	0.760456
Danaus plexippus	4AAG	16.7521
Danaus plexippus	3AAG+1AAA	32.9915
Danaus plexippus	2AAG+2AAA	27.5214
Danaus plexippus	1AAG+3AAA	14.7009
Danaus plexippus	4AAA	1.02564
Danio rerio	4AAG	24.5283
Danio rerio	3AAG+1AAA	42.0644
Danio rerio	2AAG+2AAA	17.0921
Danio rerio	1AAG+3AAA	5.21643
Danio rerio	4AAA	1.22087
Daphnia pulex	4AAG	23.2987
Daphnia pulex	3AAG+1AAA	35.1788
Daphnia pulex	2AAG+2AAA	20.0692
Daphnia pulex	1AAG+3AAA	12.3414
Daphnia pulex	4AAA	2.07612
Dasypus novemcinctus	4AAG	16.2059
Dasypus novemcinctus	3AAG+1AAA	32.9838
Dasypus novemcinctus	2AAG+2AAA	25.7388
Dasypus novemcinctus	1AAG+3AAA	9.81888
Dasypus novemcinctus	4AAA	5.91039
Dendroctonus ponderosae	4AAG	13.6674
Dendroctonus ponderosae	3AAG+1AAA	35.3075
Dendroctonus ponderosae	2AAG+2AAA	34.3964
Dendroctonus ponderosae	1AAG+3AAA	7.0615
Dendroctonus ponderosae	4AAA	0
Dictyostelium discoideum	4AAG	0
Dictyostelium discoideum	3AAG+1AAA	18.0556
Dictyostelium discoideum	2AAG+2AAA	16.6667
Dictyostelium discoideum	1AAG+3AAA	31.9444
Dictyostelium discoideum	4AAA	29.5139
Dipodomys ordii	4AAG	24.0481
Dipodomys ordii	3AAG+1AAA	35.2705
Dipodomys ordii	2AAG+2AAA	23.0461
Dipodomys ordii	1AAG+3AAA	8.01603
Dipodomys ordii	4AAA	0.400802
Drosophila ananassae	4AAG	22.2008
Drosophila ananassae	3AAG+1AAA	38.417
Drosophila ananassae	2AAG+2AAA	20.0772
Drosophila ananassae	1AAG+3AAA	5.01931
Drosophila ananassae	4AAA	0.772201
Drosophila erecta	4AAG	19.5755
Drosophila erecta	3AAG+1AAA	34.1981
Drosophila erecta	2AAG+2AAA	19.3396
Drosophila erecta	1AAG+3AAA	6.60377
Drosophila erecta	4AAA	0.707547
Drosophila grimshawi	4AAG	31.2639
Drosophila grimshawi	3AAG+1AAA	36.5854
Drosophila grimshawi	2AAG+2AAA	21.5078
Drosophila grimshawi	1AAG+3AAA	4.87805
Drosophila grimshawi	4AAA	0.443459
Drosophila melanogaster	4AAG	22.4274
Drosophila melanogaster	3AAG+1AAA	39.5778
Drosophila melanogaster	2AAG+2AAA	12.9288
Drosophila melanogaster	1AAG+3AAA	6.33245
Drosophila melanogaster	4AAA	2.37467
Drosophila mojavensis	4AAG	32.1513
Drosophila mojavensis	3AAG+1AAA	41.1348
Drosophila mojavensis	2AAG+2AAA	15.13
Drosophila mojavensis	1AAG+3AAA	3.78251
Drosophila mojavensis	4AAA	0.945626
Drosophila persimilis	4AAG	26.087
Drosophila persimilis	3AAG+1AAA	34.7826
Drosophila persimilis	2AAG+2AAA	23.7852
Drosophila persimilis	1AAG+3AAA	3.83632
Drosophila persimilis	4AAA	0.511509
Drosophila pseudoobscura	4AAG	28.5088
Drosophila pseudoobscura	3AAG+1AAA	33.9912
Drosophila pseudoobscura	2AAG+2AAA	22.3684
Drosophila pseudoobscura	1AAG+3AAA	4.60526
Drosophila pseudoobscura	4AAA	0.219298
Drosophila sechellia	4AAG	18.543
Drosophila sechellia	3AAG+1AAA	48.1236
Drosophila sechellia	2AAG+2AAA	15.4525
Drosophila sechellia	1AAG+3AAA	5.29801
Drosophila sechellia	4AAA	1.10375
Drosophila simulans	4AAG	22.5201
Drosophila simulans	3AAG+1AAA	39.4102
Drosophila simulans	2AAG+2AAA	15.2815
Drosophila simulans	1AAG+3AAA	3.21716
Drosophila simulans	4AAA	0.80429
Drosophila virilis	4AAG	28.7946
Drosophila virilis	3AAG+1AAA	34.375
Drosophila virilis	2AAG+2AAA	20.7589
Drosophila virilis	1AAG+3AAA	5.58036
Drosophila virilis	4AAA	2.23214
Drosophila willistoni	4AAG	16.2228
Drosophila willistoni	3AAG+1AAA	37.5303
Drosophila willistoni	2AAG+2AAA	26.3923
Drosophila willistoni	1AAG+3AAA	5.56901
Drosophila willistoni	4AAA	0.484262
Drosophila yakuba	4AAG	20.3837
Drosophila yakuba	3AAG+1AAA	40.7674
Drosophila yakuba	2AAG+2AAA	17.9856
Drosophila yakuba	1AAG+3AAA	6.71463
Drosophila yakuba	4AAA	0.959233
Echinops telfairi	4AAG	22.5738
Echinops telfairi	3AAG+1AAA	31.2236
Echinops telfairi	2AAG+2AAA	22.1519
Echinops telfairi	1AAG+3AAA	8.22785
Echinops telfairi	4AAA	2.1097
Emiliania huxleyi	4AAG	91.8367
Emiliania huxleyi	3AAG+1AAA	6.12245
Emiliania huxleyi	2AAG+2AAA	1.36054
Emiliania huxleyi	1AAG+3AAA	0.680272
Emiliania huxleyi	4AAA	0
Entamoeba histolytica	4AAG	0.84507
Entamoeba histolytica	3AAG+1AAA	34.0845
Entamoeba histolytica	2AAG+2AAA	26.7606
Entamoeba histolytica	1AAG+3AAA	33.8028
Entamoeba histolytica	4AAA	0.28169
Equus caballus	4AAG	20.4038
Equus caballus	3AAG+1AAA	36.3443
Equus caballus	2AAG+2AAA	21.8916
Equus caballus	1AAG+3AAA	9.45802
Equus caballus	4AAA	2.76302
Erinaceus europaeus	4AAG	17.381
Erinaceus europaeus	3AAG+1AAA	34.7619
Erinaceus europaeus	2AAG+2AAA	25.2381
Erinaceus europaeus	1AAG+3AAA	10.4762
Erinaceus europaeus	4AAA	2.38095
Felis catus	4AAG	18.3599
Felis catus	3AAG+1AAA	36.5973
Felis catus	2AAG+2AAA	22.5214
Felis catus	1AAG+3AAA	7.09914
Felis catus	4AAA	3.54957
Ficedula albicollis	4AAG	20.8386
Ficedula albicollis	3AAG+1AAA	31.5121
Ficedula albicollis	2AAG+2AAA	25.7942
Ficedula albicollis	1AAG+3AAA	9.4028
Ficedula albicollis	4AAA	3.93901
Gadus morhua	4AAG	52.8428
Gadus morhua	3AAG+1AAA	25.2508
Gadus morhua	2AAG+2AAA	7.52508
Gadus morhua	1AAG+3AAA	2.50836
Gadus morhua	4AAA	0.501672
Gallus gallus	4AAG	20.7944
Gallus gallus	3AAG+1AAA	35.2804
Gallus gallus	2AAG+2AAA	20.9112
Gallus gallus	1AAG+3AAA	9.57944
Gallus gallus	4AAA	4.55607
Gasterosteus aculeatus	4AAG	33.8608
Gasterosteus aculeatus	3AAG+1AAA	36.4979
Gasterosteus aculeatus	2AAG+2AAA	12.8692
Gasterosteus aculeatus	1AAG+3AAA	4.32489
Gasterosteus aculeatus	4AAA	4.11392
Gorilla gorilla	4AAG	17.6904
Gorilla gorilla	3AAG+1AAA	30.8763
Gorilla gorilla	2AAG+2AAA	21.4578
Gorilla gorilla	1AAG+3AAA	10.8927
Gorilla gorilla	4AAA	6.96151
Guillardia theta	4AAG	62.5259
Guillardia theta	3AAG+1AAA	27.5362
Guillardia theta	2AAG+2AAA	3.93375
Guillardia theta	1AAG+3AAA	0.828157
Guillardia theta	4AAA	0.207039
Heliconius melpomene	4AAG	7.53296
Heliconius melpomene	3AAG+1AAA	30.6968
Heliconius melpomene	2AAG+2AAA	35.2166
Heliconius melpomene	1AAG+3AAA	20.339
Heliconius melpomene	4AAA	0.564972
Helobdella robusta	4AAG	22.1463
Helobdella robusta	3AAG+1AAA	29.7561
Helobdella robusta	2AAG+2AAA	24.9756
Helobdella robusta	1AAG+3AAA	15.4146
Helobdella robusta	4AAA	1.95122
Homo sapiens	4AAG	20.3015
Homo sapiens	3AAG+1AAA	31.3568
Homo sapiens	2AAG+2AAA	23.4171
Homo sapiens	1AAG+3AAA	10.0503
Homo sapiens	4AAA	0.80402
Hyaloperonospora arabidopsidis	4AAG	42.1405
Hyaloperonospora arabidopsidis	3AAG+1AAA	36.7893
Hyaloperonospora arabidopsidis	2AAG+2AAA	12.3746
Hyaloperonospora arabidopsidis	1AAG+3AAA	1.00334
Hyaloperonospora arabidopsidis	4AAA	1.67224
Ictidomys tridecemlineatus	4AAG	20.8625
Ictidomys tridecemlineatus	3AAG+1AAA	29.021
Ictidomys tridecemlineatus	2AAG+2AAA	24.2424
Ictidomys tridecemlineatus	1AAG+3AAA	10.1399
Ictidomys tridecemlineatus	4AAA	5.12821
Ixodes scapularis	4AAG	20.6897
Ixodes scapularis	3AAG+1AAA	20.4433
Ixodes scapularis	2AAG+2AAA	13.7931
Ixodes scapularis	1AAG+3AAA	13.7931
Ixodes scapularis	4AAA	23.1527
Latimeria chalumnae	4AAG	7.90306
Latimeria chalumnae	3AAG+1AAA	22.6027
Latimeria chalumnae	2AAG+2AAA	15.7007
Latimeria chalumnae	1AAG+3AAA	12.118
Latimeria chalumnae	4AAA	35.9326
Lepisosteus oculatus	4AAG	26.1261
Lepisosteus oculatus	3AAG+1AAA	42.6126
Lepisosteus oculatus	2AAG+2AAA	16.5766
Lepisosteus oculatus	1AAG+3AAA	3.6036
Lepisosteus oculatus	4AAA	0.990991
Loa loa	4AAG	5.36913
Loa loa	3AAG+1AAA	25.1678
Loa loa	2AAG+2AAA	36.5772
Loa loa	1AAG+3AAA	21.1409
Loa loa	4AAA	5.7047
Lottia gigantea	4AAG	7.02703
Lottia gigantea	3AAG+1AAA	41.4865
Lottia gigantea	2AAG+2AAA	33.1081
Lottia gigantea	1AAG+3AAA	10.2703
Lottia gigantea	4AAA	0.810811
Loxodonta africana	4AAG	19.0833
Loxodonta africana	3AAG+1AAA	32.6473
Loxodonta africana	2AAG+2AAA	23.1993
Loxodonta africana	1AAG+3AAA	8.69972
Loxodonta africana	4AAA	6.36109
Macaca mulatta	4AAG	19.7431
Macaca mulatta	3AAG+1AAA	31.0345
Macaca mulatta	2AAG+2AAA	19.405
Macaca mulatta	1AAG+3AAA	10.5477
Macaca mulatta	4AAA	10.2772
Macropus eugenii	4AAG	16.9725
Macropus eugenii	3AAG+1AAA	36.4679
Macropus eugenii	2AAG+2AAA	27.2936
Macropus eugenii	1AAG+3AAA	10.7798
Macropus eugenii	4AAA	0.458716
Megaselia scalaris	4AAG	3.43137
Megaselia scalaris	3AAG+1AAA	48.5294
Megaselia scalaris	2AAG+2AAA	30.3922
Megaselia scalaris	1AAG+3AAA	5.88235
Megaselia scalaris	4AAA	1.47059
Meleagris gallopavo	4AAG	15.7005
Meleagris gallopavo	3AAG+1AAA	33.2126
Meleagris gallopavo	2AAG+2AAA	23.0676
Meleagris gallopavo	1AAG+3AAA	12.8019
Meleagris gallopavo	4AAA	5.7971
Melitaea cinxia	4AAG	7.21649
Melitaea cinxia	3AAG+1AAA	34.2268
Melitaea cinxia	2AAG+2AAA	27.4227
Melitaea cinxia	1AAG+3AAA	17.5258
Melitaea cinxia	4AAA	3.71134
Microcebus murinus	4AAG	20.2479
Microcebus murinus	3AAG+1AAA	35.9504
Microcebus murinus	2AAG+2AAA	21.9008
Microcebus murinus	1AAG+3AAA	9.09091
Microcebus murinus	4AAA	1.23967
Mnemiopsis leidyi	4AAG	18.2667
Mnemiopsis leidyi	3AAG+1AAA	38.8
Mnemiopsis leidyi	2AAG+2AAA	25.8667
Mnemiopsis leidyi	1AAG+3AAA	4.93333
Mnemiopsis leidyi	4AAA	0
Monodelphis domestica	4AAG	18.0022
Monodelphis domestica	3AAG+1AAA	34.4676
Monodelphis domestica	2AAG+2AAA	26.674
Monodelphis domestica	1AAG+3AAA	10.6476
Monodelphis domestica	4AAA	1.31723
Mus musculus	4AAG	24.3532
Mus musculus	3AAG+1AAA	36.8954
Mus musculus	2AAG+2AAA	20.0787
Mus musculus	1AAG+3AAA	6.13048
Mus musculus	4AAA	0.674916
Mustela putorius furo	4AAG	20.4595
Mustela putorius furo	3AAG+1AAA	31.1816
Mustela putorius furo	2AAG+2AAA	21.4442
Mustela putorius furo	1AAG+3AAA	9.95624
Mustela putorius furo	4AAA	7.22101
Myotis lucifugus	4AAG	17.9054
Myotis lucifugus	3AAG+1AAA	34.6847
Myotis lucifugus	2AAG+2AAA	23.0856
Myotis lucifugus	1AAG+3AAA	9.68468
Myotis lucifugus	4AAA	2.59009
Nasonia vitripennis	4AAG	18.3463
Nasonia vitripennis	3AAG+1AAA	34.7545
Nasonia vitripennis	2AAG+2AAA	22.4806
Nasonia vitripennis	1AAG+3AAA	14.0827
Nasonia vitripennis	4AAA	3.10078
Nematostella vectensis	4AAG	8.78244
Nematostella vectensis	3AAG+1AAA	37.9242
Nematostella vectensis	2AAG+2AAA	36.3273
Nematostella vectensis	1AAG+3AAA	7.18563
Nematostella vectensis	4AAA	0.199601
Nomascus leucogenys	4AAG	17.7419
Nomascus leucogenys	3AAG+1AAA	33.5253
Nomascus leucogenys	2AAG+2AAA	22.235
Nomascus leucogenys	1AAG+3AAA	10.3687
Nomascus leucogenys	4AAA	5.87558
Ochotona princeps	4AAG	22.547
Ochotona princeps	3AAG+1AAA	39.4572
Ochotona princeps	2AAG+2AAA	19.6242
Ochotona princeps	1AAG+3AAA	6.88935
Ochotona princeps	4AAA	0.626305
Onchocerca volvulus	4AAG	4.78589
Onchocerca volvulus	3AAG+1AAA	19.8992
Onchocerca volvulus	2AAG+2AAA	34.5088
Onchocerca volvulus	1AAG+3AAA	27.7078
Onchocerca volvulus	4AAA	10.0756
Oreochromis niloticus	4AAG	25.6291
Oreochromis niloticus	3AAG+1AAA	34.5695
Oreochromis niloticus	2AAG+2AAA	18.4106
Oreochromis niloticus	1AAG+3AAA	5.56291
Oreochromis niloticus	4AAA	4.96689
Ornithorhynchus anatinus	4AAG	19.7037
Ornithorhynchus anatinus	3AAG+1AAA	38.3704
Ornithorhynchus anatinus	2AAG+2AAA	21.1852
Ornithorhynchus anatinus	1AAG+3AAA	8.14815
Ornithorhynchus anatinus	4AAA	4
Oryctolagus cuniculus	4AAG	25.4079
Oryctolagus cuniculus	3AAG+1AAA	33.1002
Oryctolagus cuniculus	2AAG+2AAA	19.9301
Oryctolagus cuniculus	1AAG+3AAA	8.50816
Oryctolagus cuniculus	4AAA	4.1958
Oryzias latipes	4AAG	23.382
Oryzias latipes	3AAG+1AAA	34.1336
Oryzias latipes	2AAG+2AAA	17.3278
Oryzias latipes	1AAG+3AAA	6.05428
Oryzias latipes	4AAA	7.41127
Otolemur garnettii	4AAG	16.3902
Otolemur garnettii	3AAG+1AAA	29.7561
Otolemur garnettii	2AAG+2AAA	22.3415
Otolemur garnettii	1AAG+3AAA	10.0488
Otolemur garnettii	4AAA	9.56098
Ovis aries	4AAG	23.023
Ovis aries	3AAG+1AAA	28.4284
Ovis aries	2AAG+2AAA	24.024
Ovis aries	1AAG+3AAA	8.10811
Ovis aries	4AAA	2.6026
Pan troglodytes	4AAG	18.4615
Pan troglodytes	3AAG+1AAA	34.6154
Pan troglodytes	2AAG+2AAA	22.6923
Pan troglodytes	1AAG+3AAA	10.8974
Pan troglodytes	4AAA	1.79487
Papio anubis	4AAG	22.5768
Papio anubis	3AAG+1AAA	36.4066
Papio anubis	2AAG+2AAA	22.2222
Papio anubis	1AAG+3AAA	6.61939
Papio anubis	4AAA	1.30024
Paramecium tetraurelia	4AAG	8.0749
Paramecium tetraurelia	3AAG+1AAA	25.512
Paramecium tetraurelia	2AAG+2AAA	29.842
Paramecium tetraurelia	1AAG+3AAA	25.8046
Paramecium tetraurelia	4AAA	5.14921
Pediculus humanus	4AAG	1.57171
Pediculus humanus	3AAG+1AAA	9.13556
Pediculus humanus	2AAG+2AAA	15.2259
Pediculus humanus	1AAG+3AAA	44.2043
Pediculus humanus	4AAA	28.5855
Pelodiscus sinensis	4AAG	16.9325
Pelodiscus sinensis	3AAG+1AAA	33.9877
Pelodiscus sinensis	2AAG+2AAA	28.7117
Pelodiscus sinensis	1AAG+3AAA	8.34356
Pelodiscus sinensis	4AAA	1.71779
Petromyzon marinus	4AAG	27.6451
Petromyzon marinus	3AAG+1AAA	41.2969
Petromyzon marinus	2AAG+2AAA	15.0171
Petromyzon marinus	1AAG+3AAA	6.48464
Petromyzon marinus	4AAA	1.02389
Phaeodactylum tricornutum	4AAG	6.77419
Phaeodactylum tricornutum	3AAG+1AAA	38.3871
Phaeodactylum tricornutum	2AAG+2AAA	37.0968
Phaeodactylum tricornutum	1AAG+3AAA	6.77419
Phaeodactylum tricornutum	4AAA	0.322581
Phytophthora infestans	4AAG	29.8569
Phytophthora infestans	3AAG+1AAA	52.7607
Phytophthora infestans	2AAG+2AAA	12.0654
Phytophthora infestans	1AAG+3AAA	0.817996
Phytophthora infestans	4AAA	0.204499
Phytophthora kernoviae	4AAG	33.6842
Phytophthora kernoviae	3AAG+1AAA	45.614
Phytophthora kernoviae	2AAG+2AAA	14.0351
Phytophthora kernoviae	1AAG+3AAA	1.40351
Phytophthora kernoviae	4AAA	0
Phytophthora lateralis	4AAG	42.7711
Phytophthora lateralis	3AAG+1AAA	41.8675
Phytophthora lateralis	2AAG+2AAA	8.73494
Phytophthora lateralis	1AAG+3AAA	0.903614
Phytophthora lateralis	4AAA	0
Phytophthora parasitica	4AAG	29.6526
Phytophthora parasitica	3AAG+1AAA	48.5112
Phytophthora parasitica	2AAG+2AAA	13.3995
Phytophthora parasitica	1AAG+3AAA	1.86104
Phytophthora parasitica	4AAA	0.868486
Phytophthora ramorum	4AAG	44.7942
Phytophthora ramorum	3AAG+1AAA	41.6465
Phytophthora ramorum	2AAG+2AAA	7.50605
Phytophthora ramorum	1AAG+3AAA	0.968523
Phytophthora ramorum	4AAA	0
Phytophthora sojae	4AAG	60.5528
Phytophthora sojae	3AAG+1AAA	29.2714
Phytophthora sojae	2AAG+2AAA	5.65327
Phytophthora sojae	1AAG+3AAA	0.125628
Phytophthora sojae	4AAA	0
Plasmodium berghei	4AAG	0.0722804
Plasmodium berghei	3AAG+1AAA	1.91543
Plasmodium berghei	2AAG+2AAA	5.89086
Plasmodium berghei	1AAG+3AAA	19.3712
Plasmodium berghei	4AAA	72.6419
Plasmodium chabaudi	4AAG	0.0877578
Plasmodium chabaudi	3AAG+1AAA	2.19394
Plasmodium chabaudi	2AAG+2AAA	8.02984
Plasmodium chabaudi	1AAG+3AAA	29.0917
Plasmodium chabaudi	4AAA	60.4651
Plasmodium falciparum	4AAG	1.10523
Plasmodium falciparum	3AAG+1AAA	5.66429
Plasmodium falciparum	2AAG+2AAA	12.595
Plasmodium falciparum	1AAG+3AAA	29.2885
Plasmodium falciparum	4AAA	50.7483
Plasmodium knowlesi	4AAG	4.73426
Plasmodium knowlesi	3AAG+1AAA	12.0143
Plasmodium knowlesi	2AAG+2AAA	18.6244
Plasmodium knowlesi	1AAG+3AAA	22.2421
Plasmodium knowlesi	4AAA	40.2412
Plasmodium vivax	4AAG	7.19132
Plasmodium vivax	3AAG+1AAA	16.9607
Plasmodium vivax	2AAG+2AAA	16.1918
Plasmodium vivax	1AAG+3AAA	19.1768
Plasmodium vivax	4AAA	38.6703
Poecilia formosa	4AAG	36.45
Poecilia formosa	3AAG+1AAA	35.5004
Poecilia formosa	2AAG+2AAA	17.0928
Poecilia formosa	1AAG+3AAA	4.23667
Poecilia formosa	4AAA	0.511322
Pongo abelii	4AAG	16.9511
Pongo abelii	3AAG+1AAA	34.3572
Pongo abelii	2AAG+2AAA	21.0466
Pongo abelii	1AAG+3AAA	9.78385
Pongo abelii	4AAA	3.41297
Pristionchus pacificus	4AAG	48.8914
Pristionchus pacificus	3AAG+1AAA	34.8115
Pristionchus pacificus	2AAG+2AAA	5.6541
Pristionchus pacificus	1AAG+3AAA	0.997783
Pristionchus pacificus	4AAA	0.443459
Procavia capensis	4AAG	19.9179
Procavia capensis	3AAG+1AAA	36.5503
Procavia capensis	2AAG+2AAA	23.4086
Procavia capensis	1AAG+3AAA	10.6776
Procavia capensis	4AAA	0.410678
Pteropus vampyrus	4AAG	22.0155
Pteropus vampyrus	3AAG+1AAA	36.124
Pteropus vampyrus	2AAG+2AAA	21.8605
Pteropus vampyrus	1AAG+3AAA	9.45736
Pteropus vampyrus	4AAA	0.775194
Pythium aphanidermatum	4AAG	57.2581
Pythium aphanidermatum	3AAG+1AAA	34.1398
Pythium aphanidermatum	2AAG+2AAA	4.30108
Pythium aphanidermatum	1AAG+3AAA	0.268817
Pythium aphanidermatum	4AAA	0
Pythium arrhenomanes	4AAG	55.9889
Pythium arrhenomanes	3AAG+1AAA	32.0334
Pythium arrhenomanes	2AAG+2AAA	5.84958
Pythium arrhenomanes	1AAG+3AAA	0.278552
Pythium arrhenomanes	4AAA	0.278552
Pythium irregulare	4AAG	48.7805
Pythium irregulare	3AAG+1AAA	39.8955
Pythium irregulare	2AAG+2AAA	6.96864
Pythium irregulare	1AAG+3AAA	0.522648
Pythium irregulare	4AAA	0
Pythium iwayamai	4AAG	57.9158
Pythium iwayamai	3AAG+1AAA	32.2645
Pythium iwayamai	2AAG+2AAA	5.01002
Pythium iwayamai	1AAG+3AAA	0.601202
Pythium iwayamai	4AAA	0
Pythium ultimum	4AAG	41.8033
Pythium ultimum	3AAG+1AAA	37.7049
Pythium ultimum	2AAG+2AAA	12.7049
Pythium ultimum	1AAG+3AAA	1.43443
Pythium ultimum	4AAA	0
Pythium vexans	4AAG	78.7582
Pythium vexans	3AAG+1AAA	17.6471
Pythium vexans	2AAG+2AAA	0.980392
Pythium vexans	1AAG+3AAA	0.326797
Pythium vexans	4AAA	0
Rattus norvegicus	4AAG	23.6842
Rattus norvegicus	3AAG+1AAA	37.931
Rattus norvegicus	2AAG+2AAA	16.8784
Rattus norvegicus	1AAG+3AAA	6.07985
Rattus norvegicus	4AAA	3.902
Rhodnius prolixus	4AAG	17.2542
Rhodnius prolixus	3AAG+1AAA	24.8609
Rhodnius prolixus	2AAG+2AAA	22.449
Rhodnius prolixus	1AAG+3AAA	23.1911
Rhodnius prolixus	4AAA	3.71058
Saccharomyces cerevisiae	4AAG	9.16031
Saccharomyces cerevisiae	3AAG+1AAA	35.8779
Saccharomyces cerevisiae	2AAG+2AAA	21.374
Saccharomyces cerevisiae	1AAG+3AAA	16.4122
Saccharomyces cerevisiae	4AAA	8.39695
Sarcophilus harrisii	4AAG	14.9398
Sarcophilus harrisii	3AAG+1AAA	28.8353
Sarcophilus harrisii	2AAG+2AAA	24.0964
Sarcophilus harrisii	1AAG+3AAA	10.7631
Sarcophilus harrisii	4AAA	14.4578
Schistosoma mansoni	4AAG	3.42857
Schistosoma mansoni	3AAG+1AAA	26.8571
Schistosoma mansoni	2AAG+2AAA	40
Schistosoma mansoni	1AAG+3AAA	22.2857
Schistosoma mansoni	4AAA	0
Solenopsis invicta	4AAG	12.115
Solenopsis invicta	3AAG+1AAA	35.729
Solenopsis invicta	2AAG+2AAA	26.4887
Solenopsis invicta	1AAG+3AAA	15.1951
Solenopsis invicta	4AAA	2.25873
Sorex araneus	4AAG	18.0371
Sorex araneus	3AAG+1AAA	38.4615
Sorex araneus	2AAG+2AAA	25.4642
Sorex araneus	1AAG+3AAA	7.95756
Sorex araneus	4AAA	0.530504
Strigamia maritima	4AAG	6.66667
Strigamia maritima	3AAG+1AAA	32.5203
Strigamia maritima	2AAG+2AAA	32.5203
Strigamia maritima	1AAG+3AAA	15.6098
Strigamia maritima	4AAA	5.20325
Strongylocentrotus purpuratus	4AAG	31.8922
Strongylocentrotus purpuratus	3AAG+1AAA	41.3534
Strongylocentrotus purpuratus	2AAG+2AAA	15.1629
Strongylocentrotus purpuratus	1AAG+3AAA	2.06767
Strongylocentrotus purpuratus	4AAA	1.81704
Sus scrofa	4AAG	18.7683
Sus scrofa	3AAG+1AAA	30.303
Sus scrofa	2AAG+2AAA	21.7986
Sus scrofa	1AAG+3AAA	7.33138
Sus scrofa	4AAA	12.4145
Taeniopygia guttata	4AAG	18.4739
Taeniopygia guttata	3AAG+1AAA	33.6011
Taeniopygia guttata	2AAG+2AAA	25.1673
Taeniopygia guttata	1AAG+3AAA	10.8434
Taeniopygia guttata	4AAA	4.68541
Takifugu rubripes	4AAG	25.8913
Takifugu rubripes	3AAG+1AAA	34.253
Takifugu rubripes	2AAG+2AAA	19.652
Takifugu rubripes	1AAG+3AAA	5.85739
Takifugu rubripes	4AAA	4.5416
Tarsius syrichta	4AAG	10.1732
Tarsius syrichta	3AAG+1AAA	37.8788
Tarsius syrichta	2AAG+2AAA	30.9524
Tarsius syrichta	1AAG+3AAA	11.2554
Tarsius syrichta	4AAA	0.865801
Tetrahymena thermophila	4AAG	2.53723
Tetrahymena thermophila	3AAG+1AAA	21.0149
Tetrahymena thermophila	2AAG+2AAA	32.1015
Tetrahymena thermophila	1AAG+3AAA	36.1831
Tetrahymena thermophila	4AAA	5.12962
Tetranychus urticae	4AAG	6.50888
Tetranychus urticae	3AAG+1AAA	42.3077
Tetranychus urticae	2AAG+2AAA	31.6568
Tetranychus urticae	1AAG+3AAA	9.76331
Tetranychus urticae	4AAA	0.295858
Tetraodon nigroviridis	4AAG	28.6925
Tetraodon nigroviridis	3AAG+1AAA	33.5351
Tetraodon nigroviridis	2AAG+2AAA	17.9177
Tetraodon nigroviridis	1AAG+3AAA	6.6586
Tetraodon nigroviridis	4AAA	7.62712
Thalassiosira pseudonana	4AAG	34.5733
Thalassiosira pseudonana	3AAG+1AAA	44.4201
Thalassiosira pseudonana	2AAG+2AAA	11.3786
Thalassiosira pseudonana	1AAG+3AAA	0.437637
Thalassiosira pseudonana	4AAA	0.218818
Toxoplasma gondii	4AAG	38.6059
Toxoplasma gondii	3AAG+1AAA	31.3673
Toxoplasma gondii	2AAG+2AAA	13.4048
Toxoplasma gondii	1AAG+3AAA	2.68097
Toxoplasma gondii	4AAA	0.268097
Tribolium castaneum	4AAG	20.0272
Tribolium castaneum	3AAG+1AAA	38.2834
Tribolium castaneum	2AAG+2AAA	24.6594
Tribolium castaneum	1AAG+3AAA	9.40054
Tribolium castaneum	4AAA	1.08992
Trichinella spiralis	4AAG	20.3883
Trichinella spiralis	3AAG+1AAA	26.5372
Trichinella spiralis	2AAG+2AAA	23.9482
Trichinella spiralis	1AAG+3AAA	19.4175
Trichinella spiralis	4AAA	0.970874
Trichoplax adhaerens	4AAG	4.29799
Trichoplax adhaerens	3AAG+1AAA	32.3782
Trichoplax adhaerens	2AAG+2AAA	35.5301
Trichoplax adhaerens	1AAG+3AAA	19.7708
Trichoplax adhaerens	4AAA	0.859599
Trypanosoma brucei	4AAG	3.53535
Trypanosoma brucei	3AAG+1AAA	11.6162
Trypanosoma brucei	2AAG+2AAA	15.6566
Trypanosoma brucei	1AAG+3AAA	17.1717
Trypanosoma brucei	4AAA	8.58586
Tupaia belangeri	4AAG	17.1558
Tupaia belangeri	3AAG+1AAA	32.2799
Tupaia belangeri	2AAG+2AAA	27.7652
Tupaia belangeri	1AAG+3AAA	10.158
Tupaia belangeri	4AAA	1.12867
Tursiops truncatus	4AAG	18.9441
Tursiops truncatus	3AAG+1AAA	37.1118
Tursiops truncatus	2AAG+2AAA	24.6894
Tursiops truncatus	1AAG+3AAA	7.29814
Tursiops truncatus	4AAA	0.465839
Vicugna pacos	4AAG	13.5802
Vicugna pacos	3AAG+1AAA	38.0247
Vicugna pacos	2AAG+2AAA	27.4074
Vicugna pacos	1AAG+3AAA	11.1111
Vicugna pacos	4AAA	1.7284
Xenopus tropicalis	4AAG	10.1156
Xenopus tropicalis	3AAG+1AAA	36.1272
Xenopus tropicalis	2AAG+2AAA	27.264
Xenopus tropicalis	1AAG+3AAA	11.4644
Xenopus tropicalis	4AAA	4.4316
Xiphophorus maculatus	4AAG	33.8418
Xiphophorus maculatus	3AAG+1AAA	34.5091
Xiphophorus maculatus	2AAG+2AAA	16.0153
Xiphophorus maculatus	1AAG+3AAA	6.76835
Xiphophorus maculatus	4AAA	1.62059
Zootermopsis nevadensis	4AAG	26.1603
Zootermopsis nevadensis	3AAG+1AAA	38.1857
Zootermopsis nevadensis	2AAG+2AAA	22.5738
Zootermopsis nevadensis	1AAG+3AAA	2.53165
Zootermopsis nevadensis	4AAA	0.632911
