# Supplementary material for: Plasmodium falciparum translational machinery condones polyadenosine repeats
Source: eLife. 2020 May 29;9:e57799. doi: 10.7554/eLife.57799 (PMC7295572; doi:10.7554/eLife.57799)
Supplement: Figure 2—source data 1. [file elife-57799-fig2-data1.xlsx]

## Sheet: Source data Figure 2A
	-PolyA36		+PolyA36
	Expression	StDEV	Expression	StDEV
H. sapiens	100	0	10	5
T. thermophila	100	0	0	0
P. falciparum	100	0	86	16

## Sheet: Source data Figure 2D
	Luminescence	SD	α-HA western blot signal
control	0.00106451	0.00012118
-PolyA36	100	4.9136	100
+PolyA36	84.995	1.74648	121.873
