# Supplementary material for: Plasmodium falciparum translational machinery condones polyadenosine repeats
Source: eLife. 2020 May 29;9:e57799. doi: 10.7554/eLife.57799 (PMC7295572; doi:10.7554/eLife.57799)
Supplement: Figure 5—source data 1. [file elife-57799-fig5-data1.xlsx]

## Sheet: Constructs
	A36-	A36+	STL	SD 36-	SD 36+	SD STL
1	2.16827	4.45576	0	3.0664	4.90192	0
2	1.57049	6.8118	0.856375	2.22101	4.21266	1.2111
3	1.87756	3.24142	6.21798	0.841268	4.58406	0.639683
4	2.46884	2.43708	3.96623	3.0195	3.44655	5.60909
5	1.55276	5.25562	3.25896	1.61458	1.71334	0.473422
6	3.58233	4.8027	4.75029	1.1295	3.48384	1.50594
7	0	1.72405	7.42795	0	2.43818	3.86215
8	3.54126	7.7008	22.5577	1.74909	0.513909	0.327442
9	8.81303	8.15076	6.7562	1.92494	1.26084	4.06401
10	9.68195	6.19385	7.80352	3.25933	0.530624	2.30094
11	11.0199	2.435	8.61729	0.320488	1.90223	1.96299
12	12.0901	9.88133	5.45632	1.87116	0.347579	5.18962
13	13.2382	5.57149	6.14921	2.06759	1.89358	2.59684
14	13.2854	7.29084	3.69291	2.42145	0.0647786	2.63706
15	5.07062	21.6717	9.1539	0.593256	4.73511	0.939187

## Sheet: Ribosome subunits
	40S	60S	40S SD	60S SD
1	0	0	0	0
2	1.61749	0.880874	0.863324	0.824511
3	3.18877	6.80735	2.76784	9.29857
4	4.95693	2.18123	3.95637	2.87968
5	8.04147	8.27647	2.51766	4.16825
6	11.0775	12.1653	4.69959	4.72569
7	11.6157	12.3988	1.57799	1.9123
8	11.4904	12.1385	0.976913	1.99931
9	11.667	12.826	0.131727	0.379536
10	8.31301	9.73108	5.4311	5.31611
11	8.91192	10.3269	3.5206	2.96305
12	9.75851	10.4081	0.717708	0.761469
13	6.87557	6.61331	1.95163	2.94849
14	9.06354	10.1738	0.318977	0.658491
15	9.42104	10.6488	3.64359	2.66474

## Sheet: GAPDH control
GAPDH
		SD
1	0.00305559	0.00432126
2	0	0
3	2.40543	0.786043
4	0.59128	0.835713
5	3.02037	0.928329
6	3.54704	0.970853
7	5.18227	0.718146
8	6.48656	0.790971
9	7.2584	0.576064
10	8.5159	0.397502
11	8.29501	0.43578
12	7.13035	0.347125
13	5.85485	0.848098
14	7.47767	0.312108
15	5.44928	0.347386
