# Supplementary material for: Plasmodium falciparum translational machinery condones polyadenosine repeats
Source: eLife. 2020 May 29;9:e57799. doi: 10.7554/eLife.57799 (PMC7295572; doi:10.7554/eLife.57799)
Supplement: Figure 6—source data 1. [file elife-57799-fig6-data1.xlsx]

## Sheet: Source data Figure 6D
gene	mean con	SD con		mean -Ile	SD - Ile
PF3D7_0512700	1	0.0121205		0.924201	0.075399
PF3D7_0110600	1	0.0213676		1.90341	0.0232077
PF3D7_0903400	1	0.0100365		2.63601	0.0257244
PF3D7_1450600	1	0.0514438		1.4233	0.0582359
PF3D7_1364700	1	0.00952529		1.2267	0.012499
PF3D7_1121000	1	0.00884568		1.11597	0.0200877
PF3D7_1341600	1	0.00401038		1.3248	0.023411
PF3D7_1341600	1	0.00741876		1.14989	0.0172107
PF3D7_1138600	1	0.0113129		0.693094	0.0530617
