# Supplementary material for: Plasmodium falciparum translational machinery condones polyadenosine repeats
Source: eLife journal article supplement (doi:10.7554/elife.57799), 2020-05-29

Figure 6-figure supplement 1.

diacylglycerol O-acyltransferase  
PF3D7\_0322300 653 aa (total of 75 Ile, run of 4 Ile, run of 7 Lys)

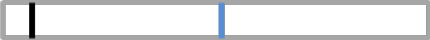

orotate phosphoribosyltransferase  
PF3D7\_0512700 281 aa (total of 27 Ile, run of 4 Ile)

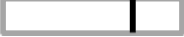

phosphatidylinositol-4-phosphate 5-kinase  
PF3D7\_0110600 1710 aa (total of 154 Ile, run of 3 and 4 Ile, runs of 14 and 7 Lys)

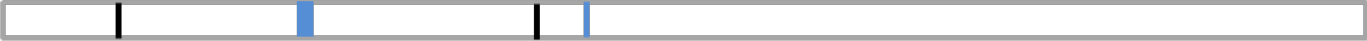

ATP-dependent RNA helicase DDX60, putative  
PF3D7\_0903400 2536 aa (total 247 Ile, runs of 3 and 2 x 4 Ile)

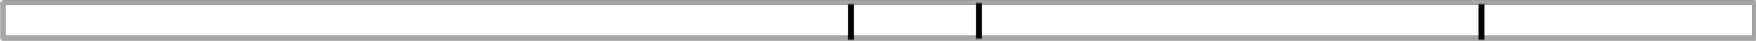

S-adenosylmethionine-dependent methyltransferase, putative  
PF3D7\_1450600 587 aa (total of 65 Ile, runs of 3 and 4 Ile)

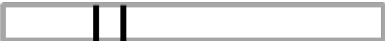

WD repeat-containing protein, putative, pseudogene  
PF3D7\_1364700 432 aa (total of 62 Ile, runs of 7 and 2 x 3 Ile)

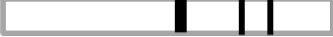

palmitoyltransferase DHHC3  
PF3D7\_1121000 293 aa (total of 36 Ile, runs of 3 and 4 Ile)

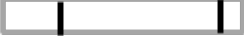

GPI mannosyltransferase  
PF3D7\_1341600 786 aa (total of 93 Ile, 1 run of 5 Ile)

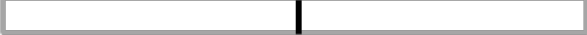

palmitoyltransferase DHHC8, putative  
PF3D7\_1321400 313 aa (total of 44 Ile, 1 run of 5 Ile)

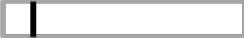

beta-catenin-like protein 1, putative  
PF3D7\_1138600 527 aa (total of 65 Ile, runs of 5 and 3 Ile)

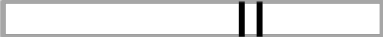

Supplement: supp [file elife-57799-supp-v1.zip]
