# Supplementary material for: Plasmodium falciparum translational machinery condones polyadenosine repeats
Source: eLife journal article supplement (doi:10.7554/elife.57799), 2020-05-29
Supplement: supp [file elife-57799-supp-v1.zip]

Figure 7-figure supplement 2.

|        |                                                                                                   |   |                                      |      |
|--------|---------------------------------------------------------------------------------------------------|---|--------------------------------------|------|
| Hs18S  | UUGCAAUUAUCCCCAUGAACGAGGAAUUCCCAUGAAAGUGCGGGUCAUAAGCUUGCGUUGAUUAAGUCCCUGCCCUUUGUACA               | C | ACCGCCCGUCGCUACUACCGAUUGGAUGGUUUAGUG | 1734 |
| Sc18S  | UUGUAAUUAUUGCUCUUCAACGAGGAAUCCUAGUAAGCGCAAGUCAUCAGCUUGCGUUGAUUACGUCCCUGCCCUUUGUACA                | C | ACCGCCCGUCGCUAGUACCGAUUGAAUGGCUUAGUG | 1670 |
| Ec16S  | CUGCAACUCGACUCCAUGAAGUCGGAAUCGCUAGUAAUCGUGGAUCAGAAUGCCACGGUGAAUACGUUCCCGGGCCUUGUACA               | C | ACCGCCCGUCACACCAUGGGAGUGGGUUGCAAAAGA | 1433 |
| Pf18SA | UUGCAAUUAUUAUCUUGAACGAGGAAUGCCUAGUAAGCAUGAUUCAUGAUUUGUGCUGACUACGUCCCUGCCCUUUGUACA                 | C | ACCGCCCGUCGCUCCUACCGAUUGAAAGAUUGAUG  | 1967 |
| Pf18SS | UUGCAAUUAUUAUCUUGAACGAGGAAUGCCUAGUAAGCAUGAUUCAUUAAGAUUUGUGCUGACUACGUCCCUGCCCUUUGUACA              | C | ACCGCCCGUCGCUCCUACCGAUUGAAAGAUUGAUA  | 2014 |
| Tt18S  | UUGGAAUGUUGGAUCUUAGACGAGGAAUUCUAGUAAGUGCAAGUCACUAGCUUGCG-UGAUUAUGUC-CUGCCGUUGUACA                 | C | ACCGCCCGUCGCUUGUAGUAAC--GAUGGUCUGGGU | 1603 |
|        | ** * * * * * * * * * * * * * * * * * *                                                            |   |                                      |      |
| Hs18S  | AGGCCUCUGGAUCGGCCCCGCCGGGGUCGGCCACGGCCCU--GGCGG--AGCGCUGAGAAGACGGU-CGAACUUGACUAUC-UAGAGGAAGUAAA   | A | AGUCGUAACAAGGUUCCGUAGG               | 1847 |
| Sc18S  | AGGCCUCAGGAUCUGCUUAGAGAAGG---GGGCAACUCCAU---CUC--AGAGCGGAGAAUUGGA-CAAACUUGGUCAUU-UAGAGGAACUAAA    | A | AGUCGUAACAAGGUUCCGUAGG               | 1778 |
| Ec16S  | AGUAGGUAGCUUAACCUU-----C-----GGGAGGGCGCUUACCACUUUGUGAUUCAUGACUGGGGUGA                             | A | AGUCGUAACAAGGUAACCGUAGG              | 1515 |
| Pf18SA | AAUUGUUUGGACAAGAAA-----AAUU----GAAUUAUUAU--U--CUUUUUUUUCUGGAAAAACCGU--AAAUCCUAUCUUU-UAAAGGAAGGAGA | A | AGUCGUAACAAGGUUCCGUAGG               | 2070 |
| Pf18SS | AAUUGUUUGGAUAUGAAUUAUAAUAAUG---AAAUUUUAUUAUUUCUGAUUUUUUCUAGAAGAACUGU--AAAUCCUAUCUUU-UAAAGGAAGGAGA | A | AGUCGUAACAAGGUUCCGUAGG               | 2127 |
| Tt18S  | AACCUUCUG-AC-UGC-----GACGACAAU-----GUUGGCGAAAAUAAGU--AAACCCUCACAUU-UGGACAAACAAGA                  | A | AGUCGUAACAAG-UAUCUGUA-G              | 1690 |
|        | * * * * *                                                                                         |   |                                      |      |
| Hs18S  | UGAACCUGCGGAAGGAUCAUUA-----                                                                       |   | 1869                                 |      |
| Sc18S  | UGAACCUGCGGAAGGAUCAUUA-----                                                                       |   | 1800                                 |      |
| Ec16S  | GGAACCUGCGGUUGGAUCACCUCCUa                                                                        |   | 1542                                 |      |
| Pf18SA | UGAACCUGCGGAAGGAUCAUUA-----                                                                       |   | 2092                                 |      |
| Pf18SS | UGAACCUGCGGAAGGAUCAUUA-----                                                                       |   | 2149                                 |      |
| Tt18S  | UGAACCUGCAGAUGGAUCAUUA-----                                                                       |   | 1712                                 |      |
|        | ***** * *****                                                                                     |   |                                      |      |
