# Supplementary material for: Plasmodium falciparum translational machinery condones polyadenosine repeats
Source: eLife journal article supplement (doi:10.7554/elife.57799), 2020-05-29
Supplement: supp [file elife-57799-supp-v1.zip]

Figure 4-figure supplement 3.

**PF3D7\_1464200 zinc finger protein**

ATGGAAAAAATAAACGACAAGGCCATTTTAGAGAAAAATATCTGACATAACAGGAAATACAACCAAGAATACTCTTCTTAGCTTTAAAAAAAAG**AAGAAAAAAAAA**  
**AAAAAAAAAAAAA**TGTAGATGTAAGCGGAGATAAAACGAAAAAGAT**AAAAAATAAAAAA**TTAACAAGACAGAAAAACACTTTTGATAATTTTAAATATGAACCAAA  
AAAAGAAACATGTAAATTTTTTTTTTAAAAAAGGGAAATGTATACATAATGATAAATGTACTTATTCACATGATGTTATTCCAATATATAAAATATCAAAGTTATGTA  
AATTTTTAGTTAAAGGTACATGTCATAAACAAAATTGTATCTTTTCTCATGATTATCAACTTTTTTATTGTCGTAATAATGTTATATATAATTCATGTCATAATCCT  
GCATGTAATTTAAACATGTAAAAATAGATAATAGTATTAATAATGCAGATGAATATAATAAAGAAGTAGATAATGTTCTAACAAAAGATGATAAAATTAGATTTT  
TTTATAATAATAAAAAATTATATAATGGAGTTATTAATTCATAAATATCATACTTTTTGATAATACGGATCATAAAATAAATATAGATAATTT**AATAAAAAAAAA**TAATT  
ATCCATGGTTTATTAATGGAATTATAGATATTATTAAGTTAGACTTTAAATATAATAAAGCAGATAGTTTTTTTTAAATTAATAAATATAGCCAAAAATAATCAAAAT  
AATAATTTAAATCATAACATGGATAATTCTGCTAATCAAAATGATCAAAATAATGATCTTACAAATAACACAAATGTCAATAATCAAGATATTAATCATCACAGC  
CGTCAATAAAAGATGGGGAATTCAAAAATAATAATGATAATCAAAATGGGGATAACAAATTAGAAAAATAATGTGGAACAAAATTCGATGACTATAATTTCTATT  
CAAGTGAAGAAGAAGATTATACGCAGTACTTGAATAAGTACTTTGACATGGACACATAA

**PF3D7\_0615500 cdc2-related protein kinase 5**

ATGTTTGGAAATTACATTAAACAAAGTGCAAAAATATACTTCAATAATATATATTTGACCGTATCTCTCGAAGAAAAATTAGGGGGGGGGCACCTATGGTGACGTGTA  
CAAAGGGAAAGTAATAAAATATAATAATAATAATAATGATTTATATCAAAATACAAATTATTTACCTTATGATTATTATACTGATGAATTTGTTTTTTTTTC  
GTAAAAATGTTTATGCCATAAAATTTTTTCGAGACGATTTAAGGACCATAAATGAAGAAGGTATAAGTTGTACAACATTAAGAGAATTAAGCTGTTTAAAAAATA  
TTGGGAGGCATCCTAATATCCTTCGTTTAATAGATGTTACTATAGATAGACAAAAGCTTATAAGTGAATATATAAATAGACAGATATTACAACATTATACATCAA  
ATTATCATCATCATCATCATAGTAAATTAGATATCACACCCTTGGCAGCTGATCAGAAATTTATTTTGTCTGCTTATGAATATTGTGATGGTGGAGATCTAAAAA  
AGCTTATAC**AAAAACAAAAA**TTAGTGATGATCAAGCGGGACTTAATTTGAAAGAAGCCAAATGGCTATCCTTCCAATAATTAATGGATTAGCTTATTTACATA  
ATAATAAAATGTGTCATAGAGATTTGAAACCTGAGAATGTTATGTTACAAGAGACATCTAATCATAAGTATCTTTTAAAAAATTGGAGATTTAGGTTTATGCAGAG  
AATTA AAAAACGATGGTGACATGACACCTACTGTTTGTACAATATATTACCGACCTTTGGAAGTGCTGCTTTCGAAATTTGAATTTATCTAATAAGCATCATCATA  
AAAGTCATGCAACAAATCATAGAAGGGATGACAATGATGATGAAGATGAAGATGATGATGATGAAGATGAAGATGATGATGAAGAAGAAGAAG  
ATGACGATGTAGATGAAAAGTAGAAGTAAAATTACATGGTCGTAATAAACTAGTAGTAATAATAAAAAATAATAAACA AAAAACCAT AATAGTAACATTAATT  
ATAATAACCACAATTGGAGTCGTCGTA AAAATAAAATG**AAAAAAAAAAAAAAAAAAAAAGAAAAAAAAAA**AGAGCAAGATGATGATTATTATAAAAGATTTTC  
AATATGGTTTTAAATGTTGATATATGGTCAGCTGCATGCATTATATGTGAACCTATTATTGGAAGACCTCTTTTAAAGGAGTCAAGAAATTCGATTTGATTATTA  
GGATCGTTAATTTCTTTAGGTAAACCTAATAAAGATGAACTAGAATTTTTTAGTAATTCCTGTTTTATCCTTTAAAGGAGGATTTTTTTAATGTTCATATAAAAAA  
TAAAAGGATGCTTTAAACGTTATTACGAATGGACGAATAGACGAGTTAGGTATTGATTTGCTTGTTAAGATGTTGAAATATAATCCGAATGATCGTATTACGG  
CAGCTGATGCTTTATCGCATCCTTGGTTTTTCAGATATAAGATTTGATAACTTGGATGGTATAGGTGTTTATAATTGGTATGTACATTGTTTAAATATTATATTG  
GTATTA AAAC TTTTAGAGAAATTG**ACAAAAAAAAAAAAA**TTTACTTACGACAACATGATTTCTCATTTTTTATGTAAATCAAATGATAAGTATGCTAAGGTTAT  
TTTTAAGTTAATTAATGATACCTTTAAAAATTTAGGAGGATATAAAAAAAGTGACGAAGATCTTTTGCTATTTTTTCAGATAAATATGCTCATGATGAAAAGAAT  
ACAAATGGATTTATTA AAAAGAGCAAGTATTAAAGTATTAAATGATATGAAAGAAAAAAATGTGAAAGAAACAAAAGAAGAGTTTTCTTTTTATGATGAAAGTACA  
ACTTATATGACACCACCAACATCTGTTAAAGAAGAAAATTCATAGATCAAGTTATCATGTTATGAACCCAGAACATTTCATATGAATTTACAAATAAAATCAGA  
ATGAAAAGAAATCTATCCATTCCAGATTTTTCAACACCTGATAAAAGTATAC**AAAAACAAAAAA**ATAAAGCTGCTACGACAAAGAATAAAGCAAGTCATCTA  
GAATTTTCTCATTTTTAA

**PF3D7\_1108000 IWS1-like protein**

ATGGATAGCGATTCAAATAAGAATGACCACGAGTCGTTAGAAAACCTCAGGTTTTATTCAACGACGAAAAATGCATCTGATGGAAATAATGTTGAGAACTTTAAGA  
AAAAAATGAAAATGATAAAAGTATTAATGTAAAGAAAAATAAAGAAAATAAAGAAAATAGAAAGGATAAGAAGAAAAAGAAAACCTCAAAGGATTATCGATGAT  
GATAATGAAGATGAAGATGATGTTATTGAGAAAGAAAATGATCAAGGAAAAGATCAAGGAAAAGATCAAGGAAAAGATCAAGGAAAAGATCAAGAGGATGTGT  
TTCTTTTTGGTAATGATGATTTGGTTGAAGAGGATGAGGAGAGACATAAGAAGAAAAGGAAAAAAGAAAAGGAAGAAAGAGGTAAAC**ACAAAAAAAAAAAAAG**  
TATAAAGCGAATAATGAAAATGATGATATGCACAAGGTTTCATAGTGATGATAGTAATTATAATAATAATAACAATAATATTAGTGATGATAATAATAATAAT  
ATTAGCGATGATTATAATAATAATAATATTAGCGATGATGATGATAGTAATAATAGTGATAGCAGCTATGATAATACTATGAGTGATCATAGTGATATGAAGAAG  
**AAGAAAAAAAAAAAAAAAAAAAAAAAAAAAAA**AGCGAATTTATCGATACCATTGCAGAAGAAGGTGATGAAGATGAAAAAGAAGAAGATGACGATTATGATGA  
TGAAAATAATATAAATATAGATAAAATGACCAACGAAAAATAAAAAATCGAAGAAAATAGATTTTGATAAAATTAGGCTTAGGTGATGATGATGAAGACGAGGATA  
ATTATATGAACGATTTTGGAAATCATTCTAATATATCTGAAAAAAAAAAAAATCTCATTTTGACGAAATATTAGAAAATTTTAAATCGAAAAGAAAAAGAGTTCA  
TAAAATTTCAGAAGATGATGATTAGAATATTGTGAAAAATTTTTGAATCAGATGATTAATGCATGAACAAGATTTAAAAAGTATG**AAAGAAAAAAAC**CCAGC  
AACAGCTAAATTACAAATTATAGATAAATGTTTGTA AAATATTGACAAAACCGAAATGGAAACCATTCTTTATGAAACTAAATATATATCATGTATTAGCCTTATGG  
TTGATGCCGACATCCAAAAATACATTACCCAATTTTACTATAAGAACGAATTTATTA AAAGTAATTCACAATTAACCAATTACTATTAAATCATTAAGAGGAAGC  
CAGCTAGGAAAAATATTGACTTACCTACATTACATAAAACATGAAACAGAAGAAAATAAAAAACTCATAAAAAATATTATGCAAAATTGGATGGGCCCAATTATA  
GGAATTAATACGAACTATAAACAATATTTAAAAGAAAAGACAAAAAAGGATATCTGAAAATCCTGAATATCACAAAAAAGTTCTTGAAAAGGCAAAAACATTAATA  
CCTGATTCAATATGTATAGAAAAGGAAGAAGAACAAAATGAAATGAAAAGACATGCAAGTATTCCTTATAATAGTGAATGCTCATTCTAATTAATGTCCCCTCT  
TCTATACCTAGTATTAGTAAAAAAATCATTCCCAAAAGTAAAAATTAAGAGGTTAACAGATAATATGAAATTGTTAAAAAGATGTAAAAAAATGCAAAAGGTTTCA  
ATTGAAGGAAAGGGTGTAGCTGTTGCACCATAA

**PF3D7\_1462800 glyceraldehyde-3-phosphate dehydrogenase (GAPDH)**

ATGGCAGTAACAAAACCTTGAATTAATGGATTTGGTCGTATCGGACGTTTAGTATTTAGAGCAGCCTTTGGAAGGAAAGATATCGAAGTAGTTGCTATTAACG  
ACCCATTTATGGACCTTAACCACTTATGCTATCTCTTGAAATACGATTACAGTACATGGTCAATTTCCATGTGAGGTAACCCACGCTGATGGATTTTTATTAATC  
GGAGAAAAGAAAGTCAGTGTTTTTGTGAAAAGGATCCATCTCAAATTCCTTGGGGAAAATGCCAAGTAGATGTTGTATGTGAATCAACTGGTGATTTTTTAAC  
CAAAGAATTAGCTAGCAGTCACCTTAAGGGAGGAGCCAAAGAAGGTTATTATGTCCGCCCCACCAAGGATGACACCCCAATTTATGTTATGGGTATTAACCA  
CCACCAATATGATACCAACAACCTTATTGTTTCCAATGCATCATGTACCACAACTGCTTAGCTCCATTAGCTAAAGTTATTAATGATCGTTTTTGAATTGTTGA  
AGGTTTAATGACCACCGTTTCATGCATCCACTGCTAACCAATTAGTTGTTGATGGTCCATCAAAGGGTGGTAAGGACTGGAGAGCAGGTAGATGTGCATTATC  
CAACATTATTCAGCTTCCACTGGTGCAGCTAAAGCTGTAGGTAAGTTTTACCTGAACCTTAATGGAAAATTAACAGGTGTAGCTTTTCAGAGTACCAATTGGAA  
CTGTATCAGTTGTTGATTTAGTTTGCAGATTACAAAAACCAGCAAAATATGAAGAAGTTGCTTTAGAAATTA AAAAAGCTGCTGAAGGTCCACTTAAAGGAATC  
TTAGGATACACTGAAGATGAAGTTGTTTCTCAAGATTTGTTTCATGATAACAGATCATCAATCTTTGACATGAAAGCTGGTTTAGCCTTAAACGACAATTTCTTC  
AAATTAGTTTCATGGTACGATAATGAATGGGGATACTCAAACCGTGTCTTGATTTAGCCGTACACATTACTAACAACATAA
