# Supplementary figures and images for: Plasmodium falciparum translational machinery condones polyadenosine repeats
Source: eLife journal article supplement (doi:10.7554/elife.57799), 2020-05-29

Figure 1-figure supplement 1.

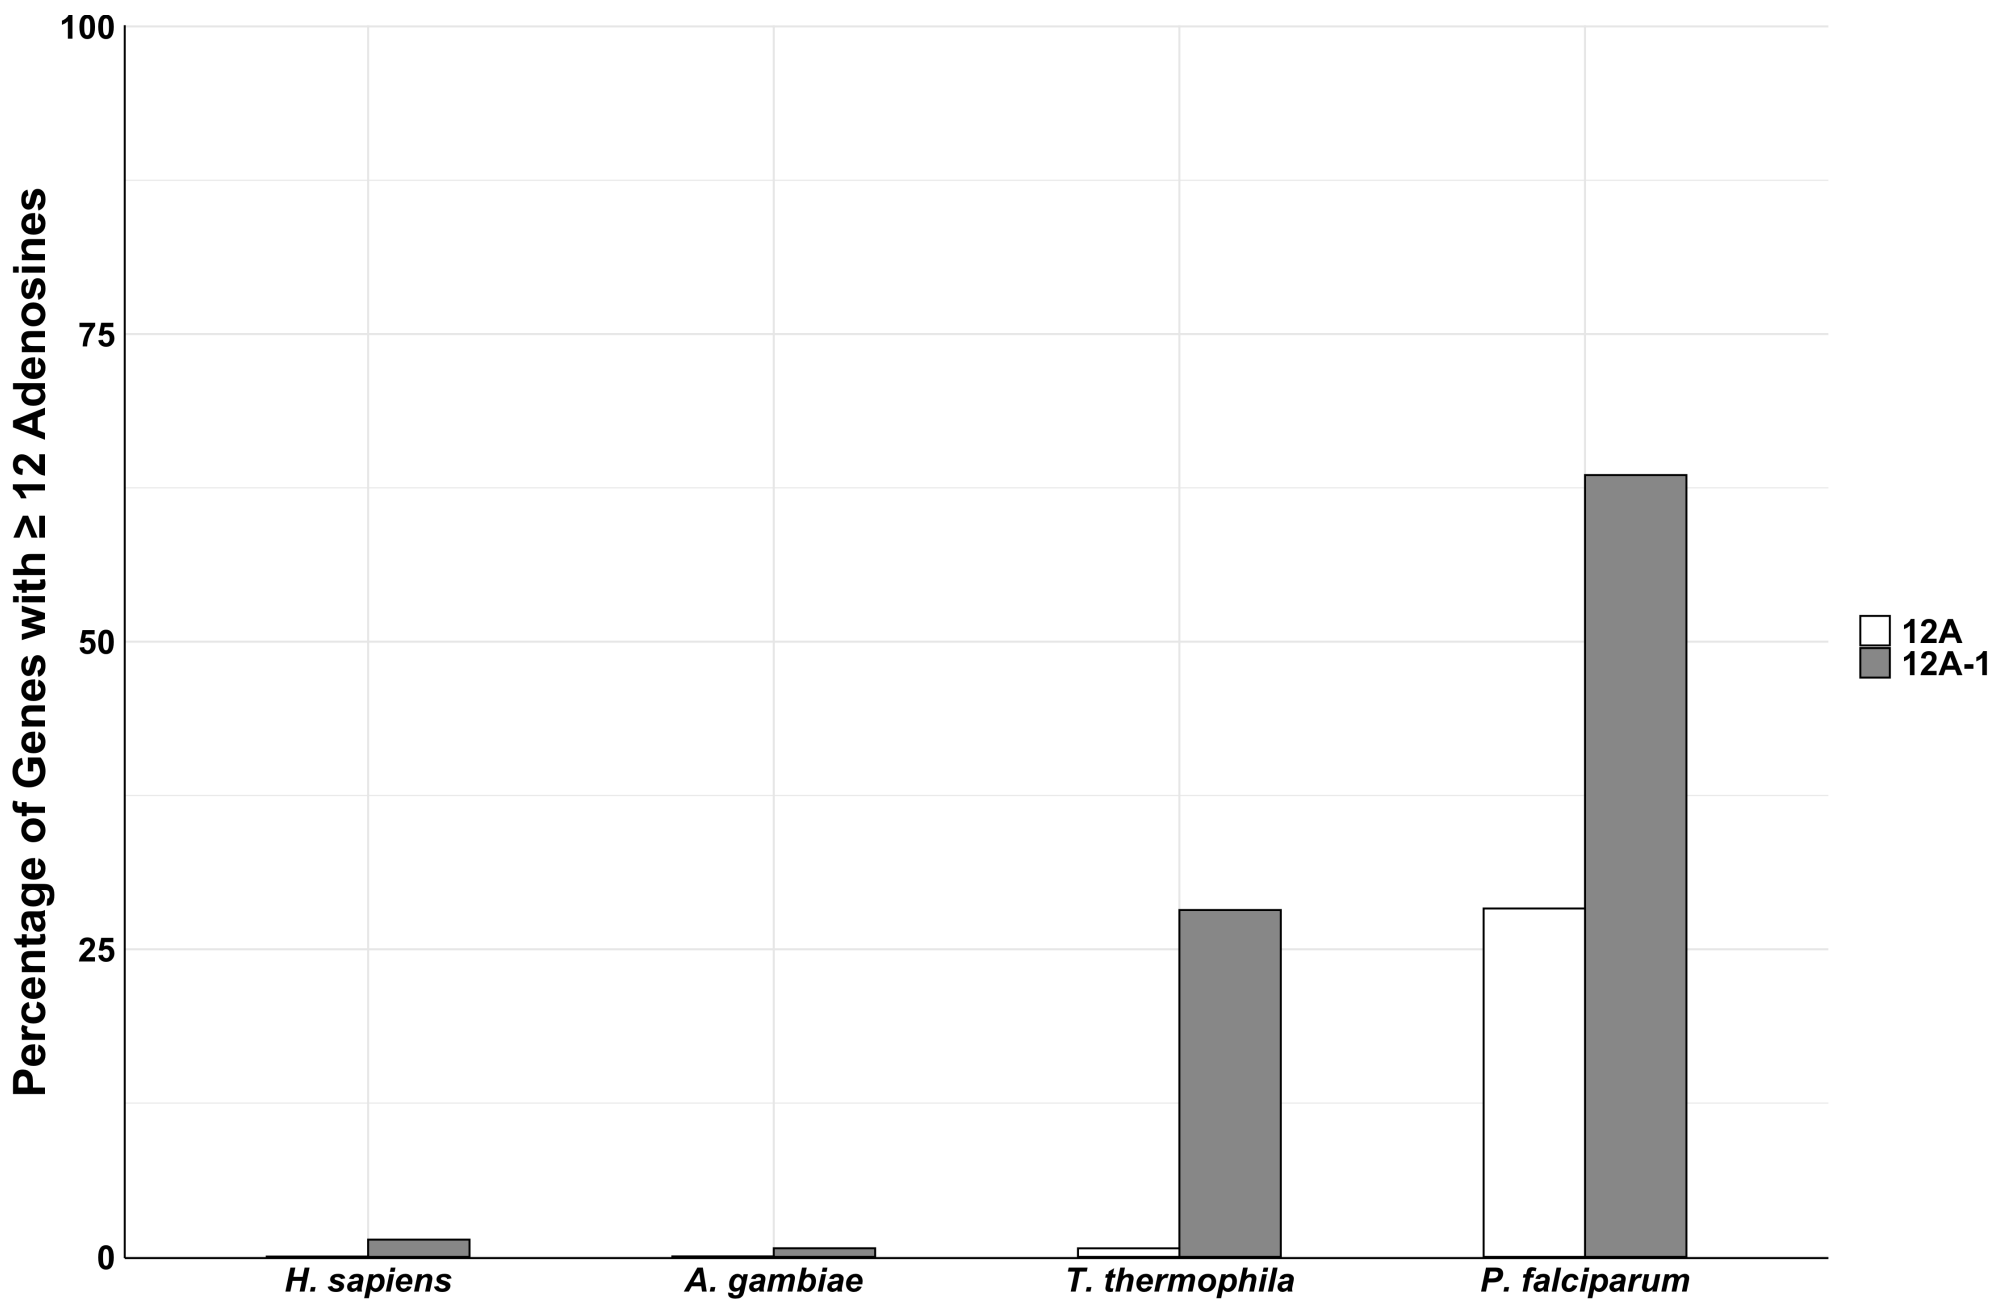

Supplement: supp [file elife-57799-supp-v1.zip]

Figure 5-figure supplement 2.

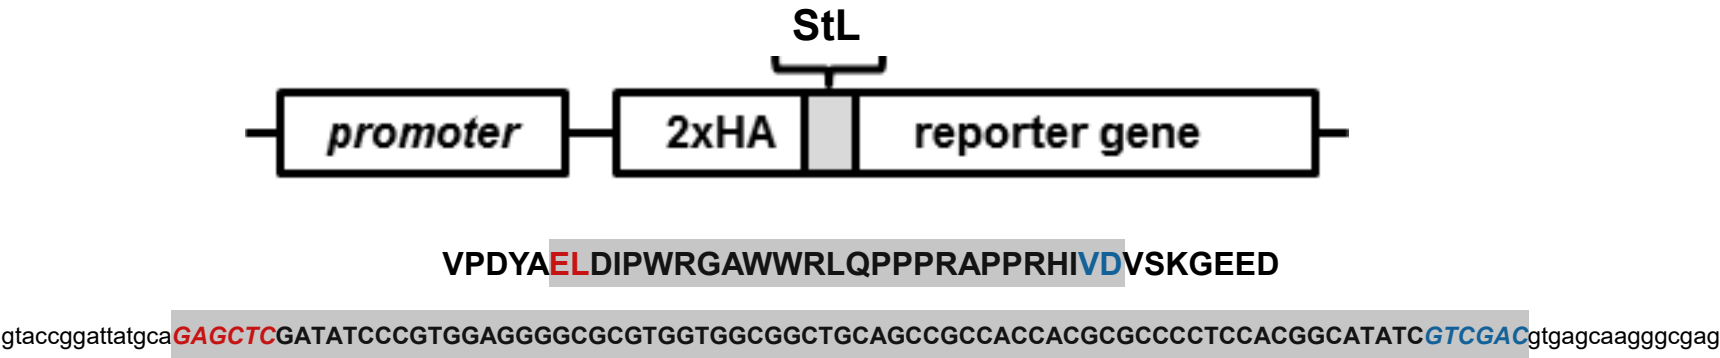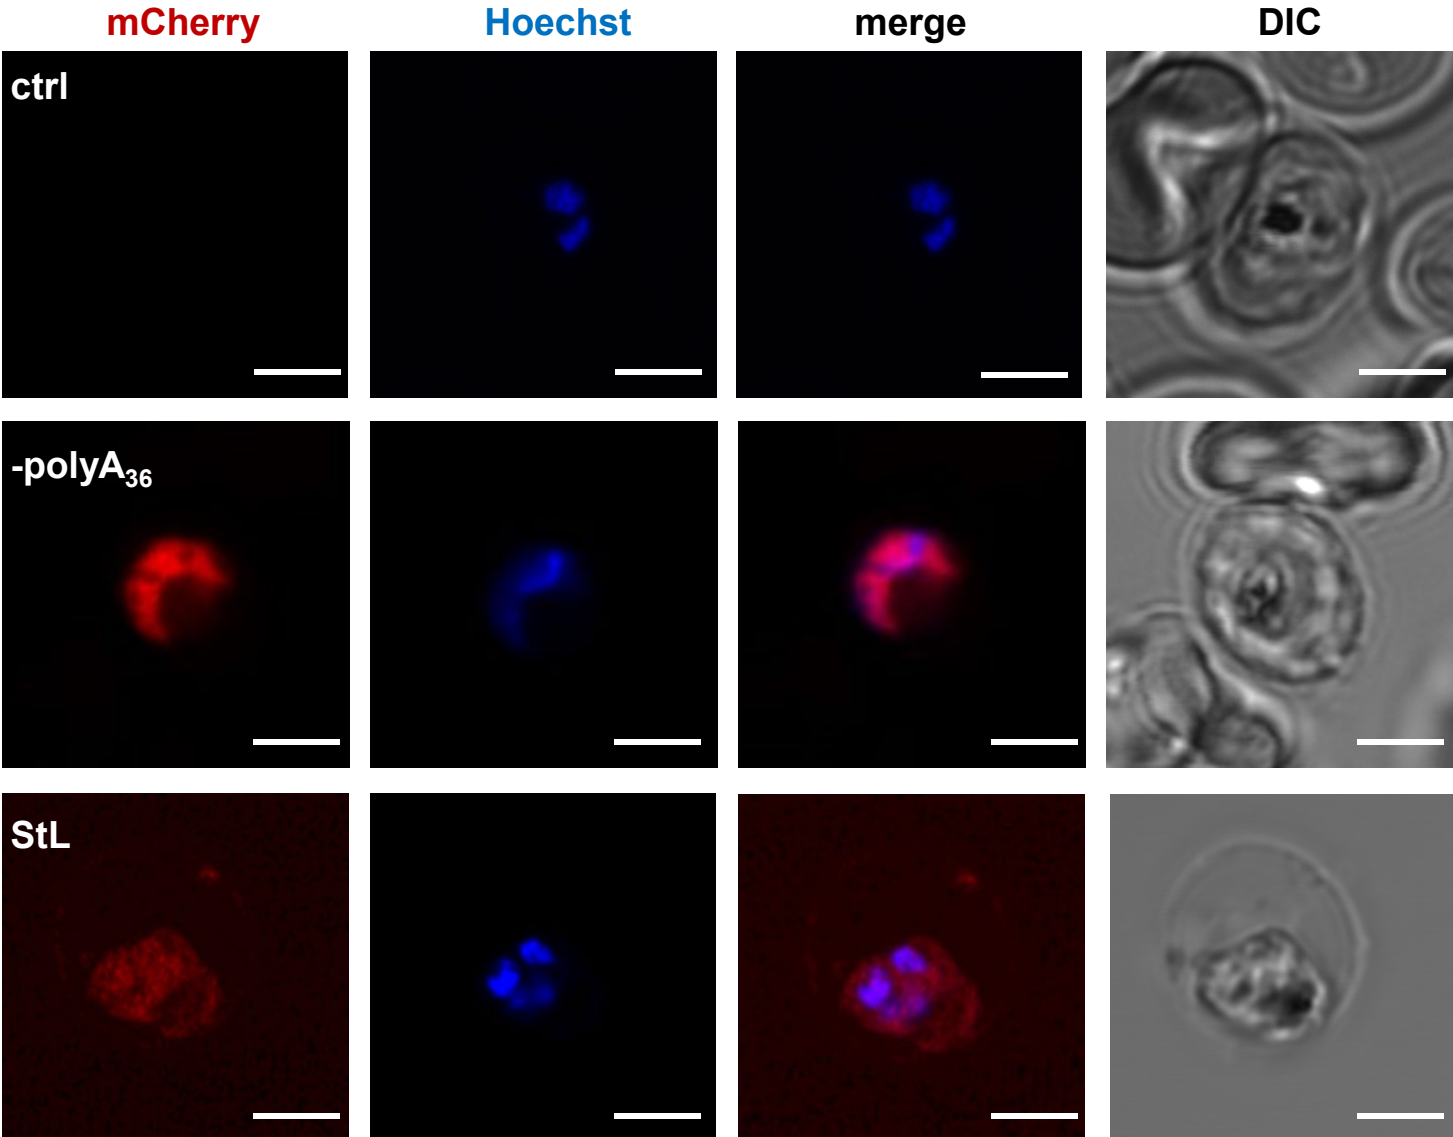

Supplement: supp [file elife-57799-supp-v1.zip]

Figure 2-figure supplement 3.

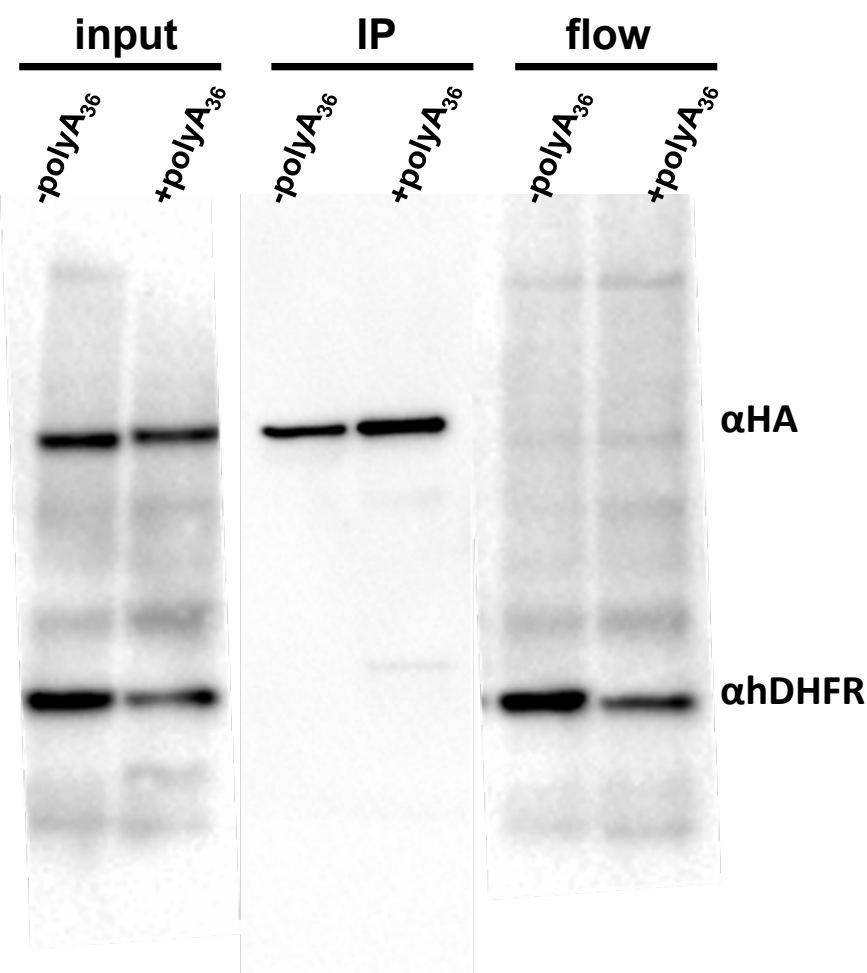

Supplement: supp [file elife-57799-supp-v1.zip]

Figure 4-figure supplement 2.

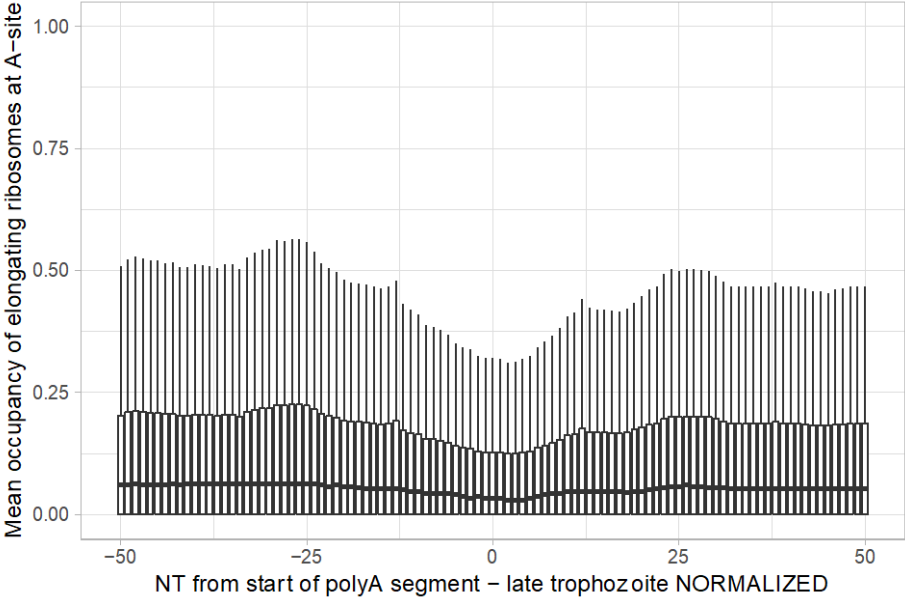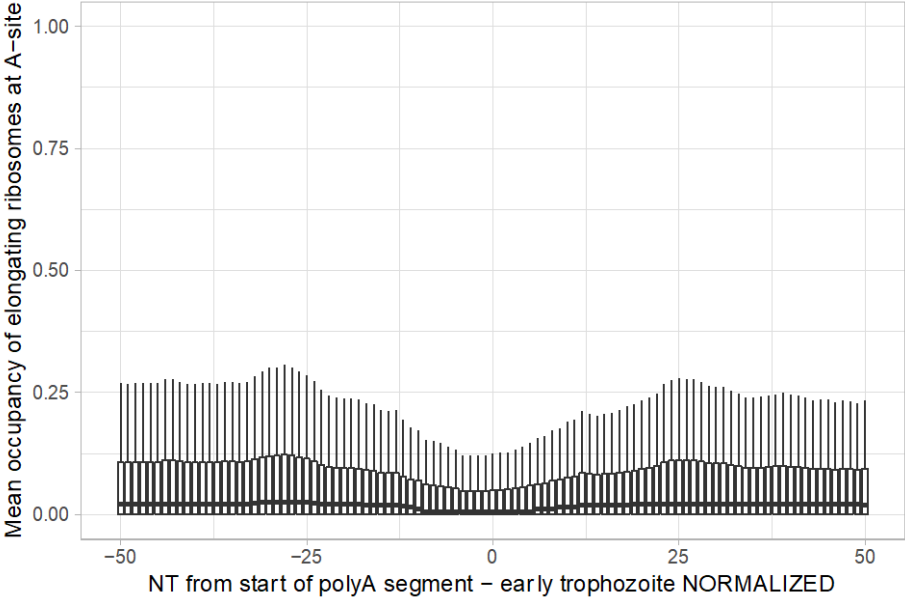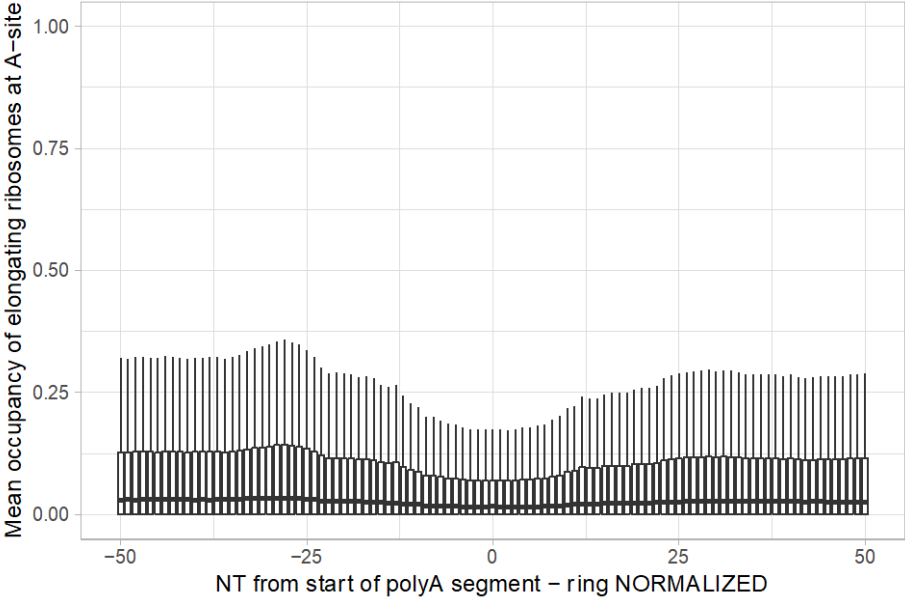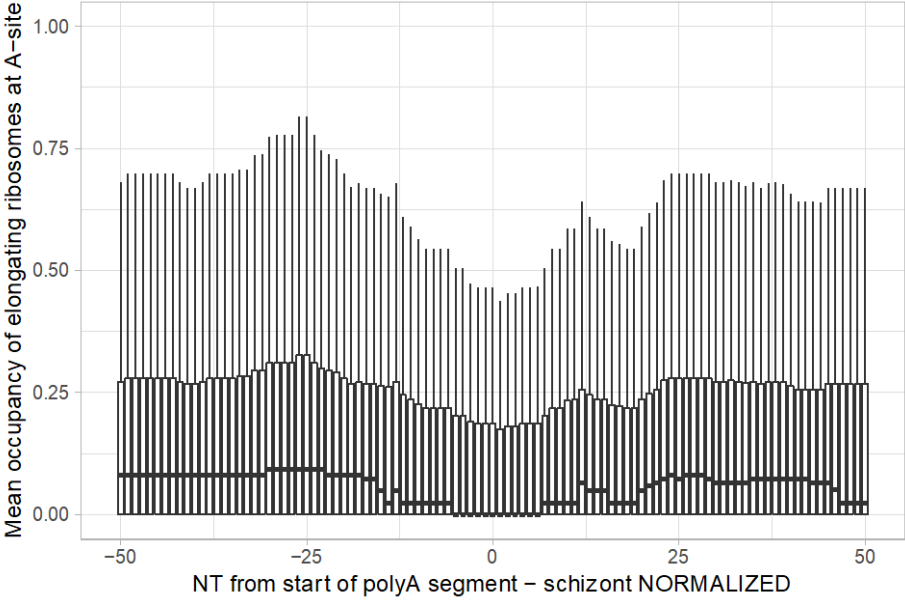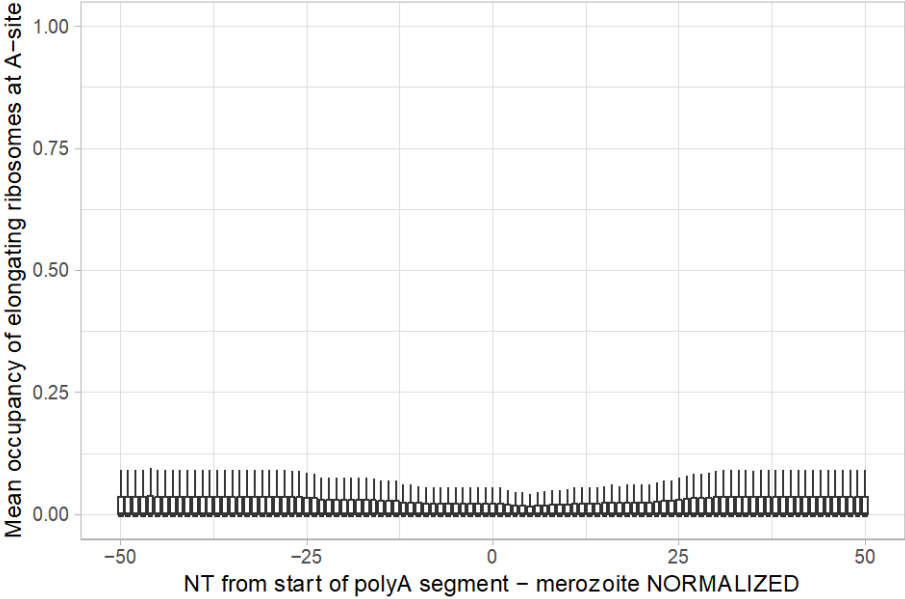

Supplement: supp [file elife-57799-supp-v1.zip]

Figure 2-figure supplement 1.

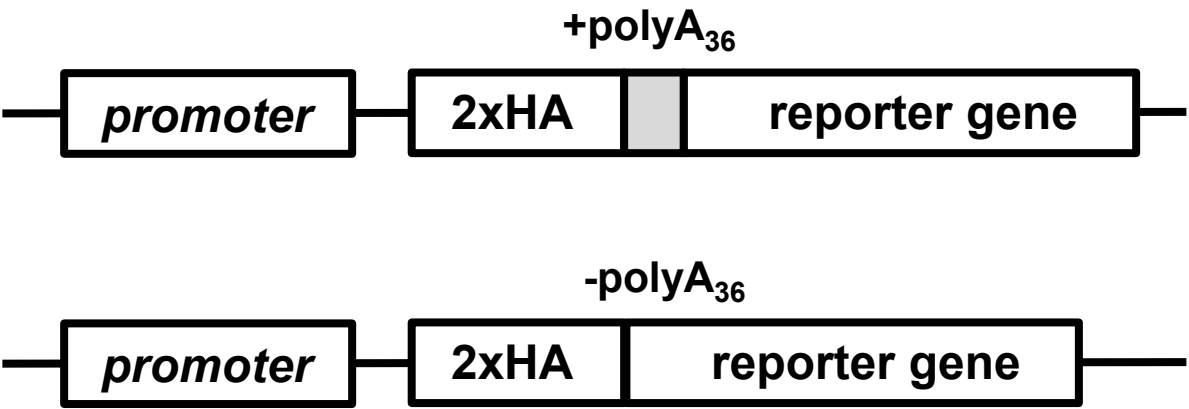

Supplement: supp [file elife-57799-supp-v1.zip]

Figure 5-figure supplement 1.

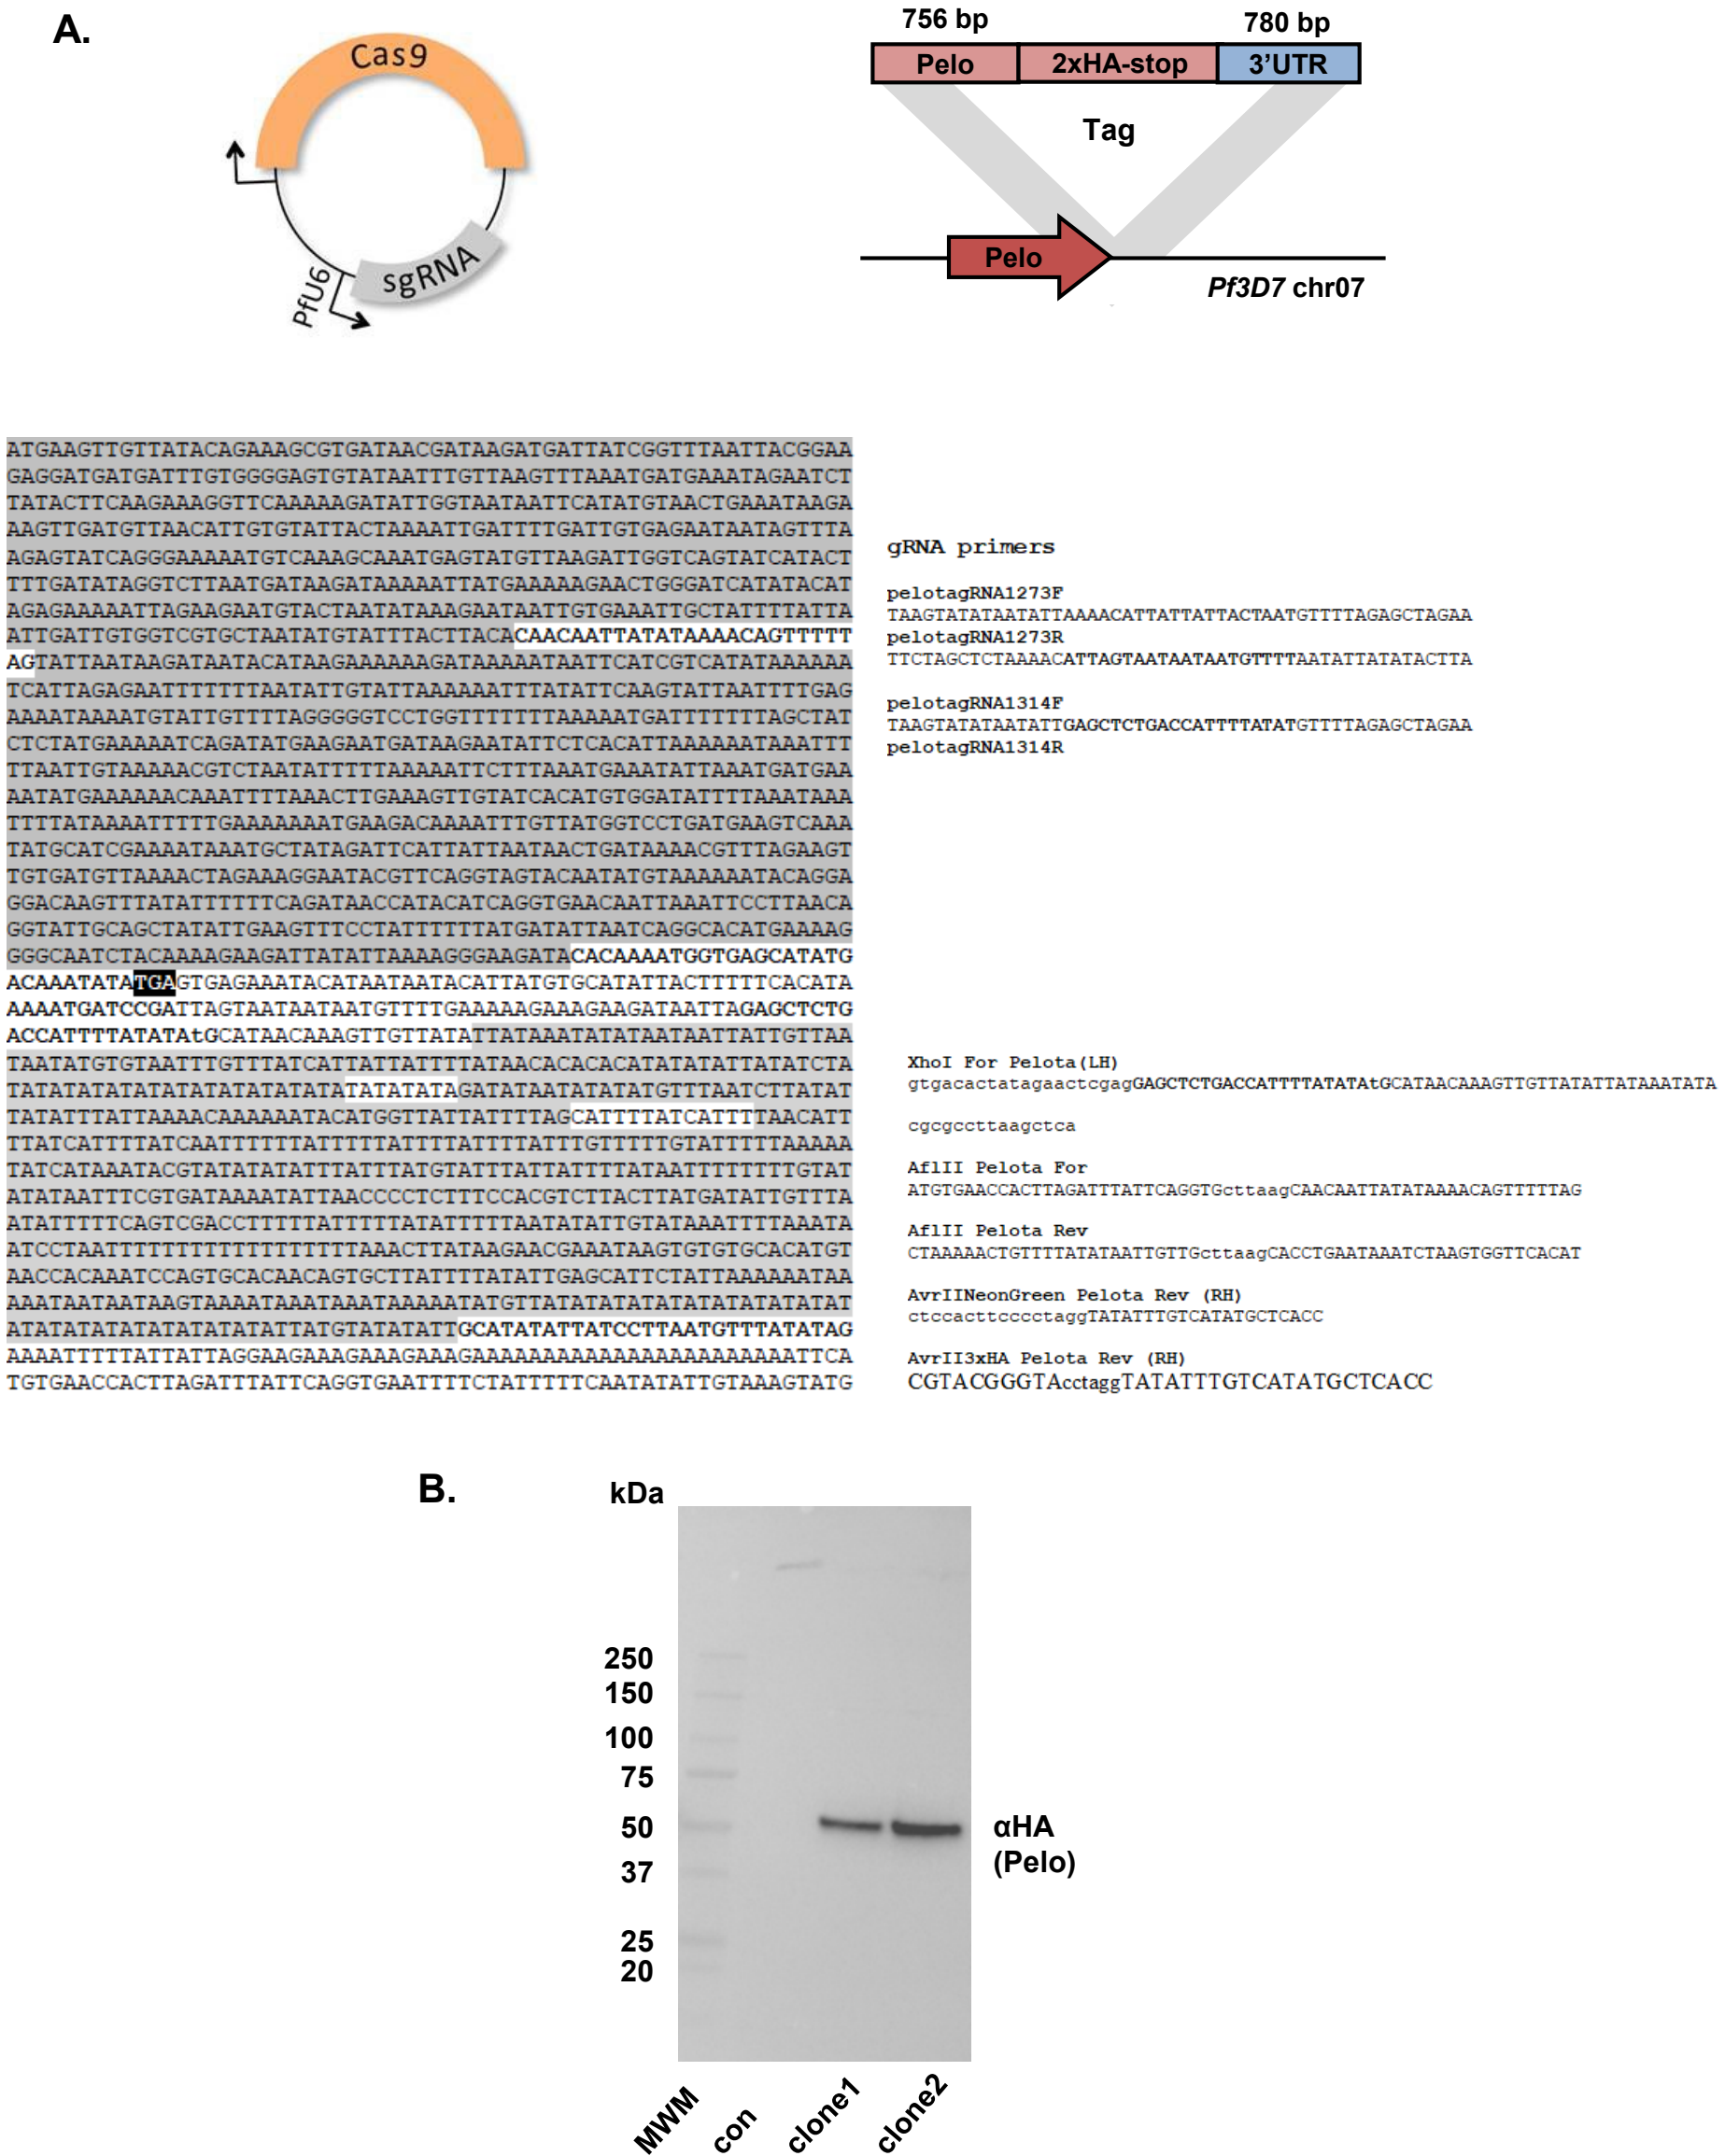

Supplement: supp [file elife-57799-supp-v1.zip]

Figure 4-figure supplement 1.

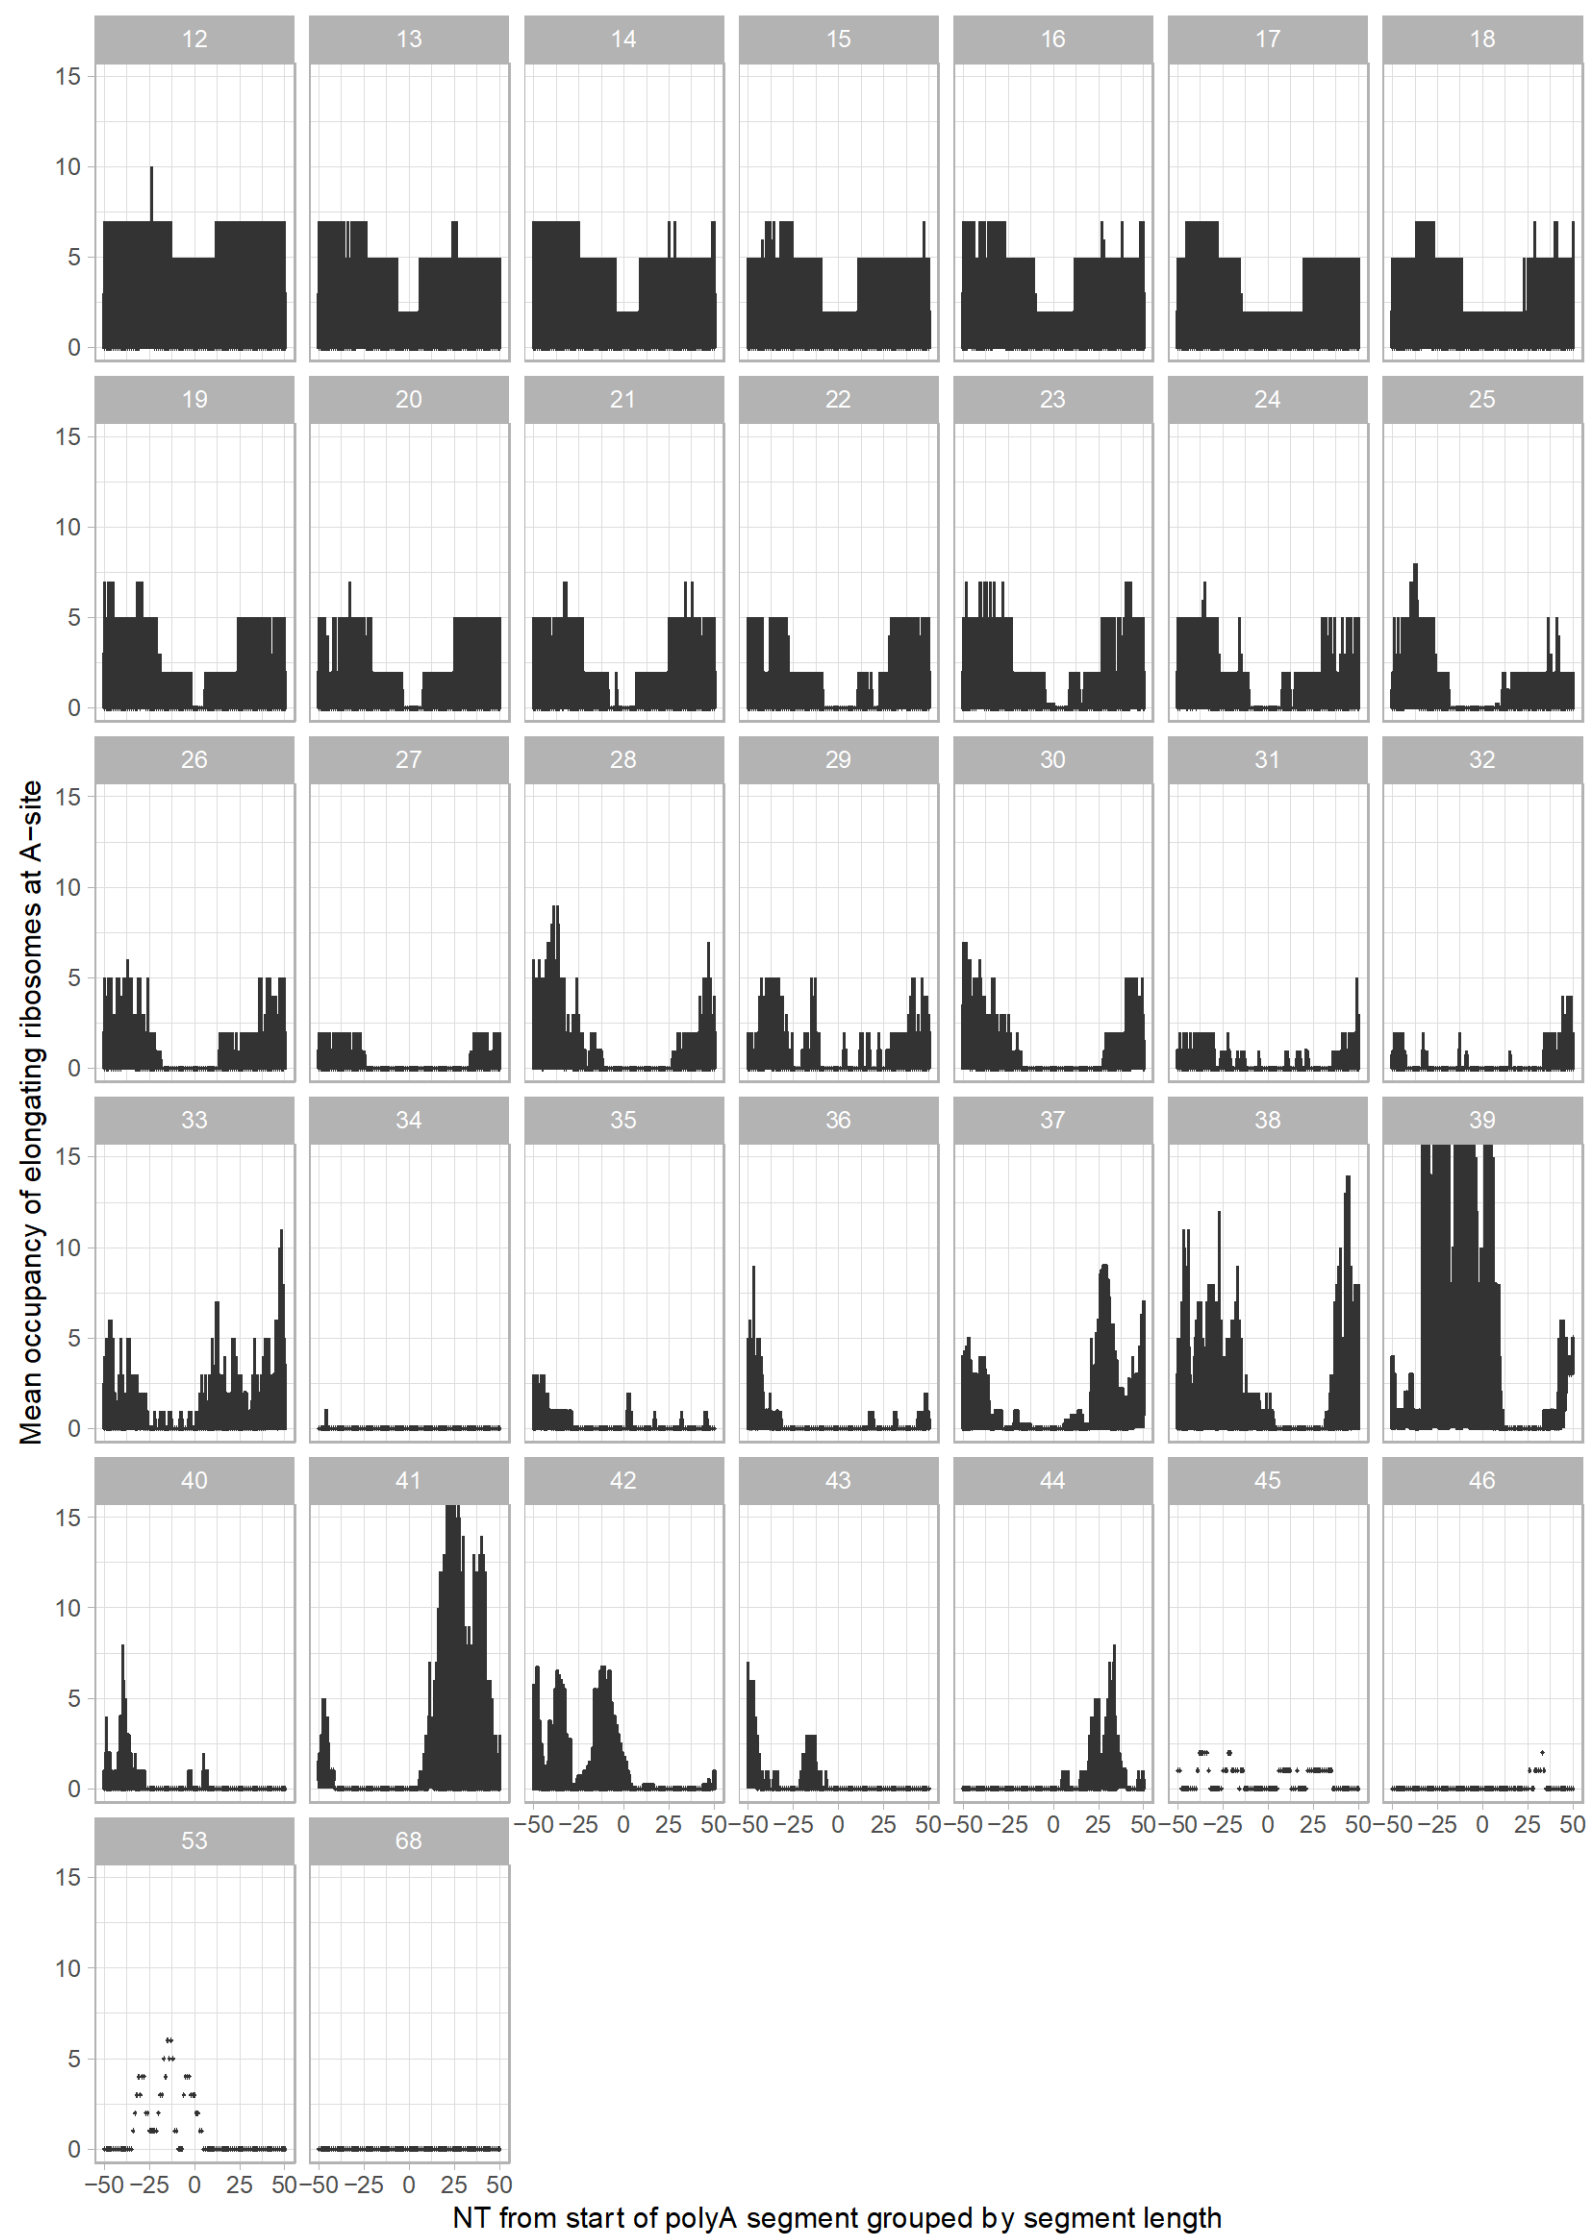

Supplement: supp [file elife-57799-supp-v1.zip]

Figure 4-figure supplement 5.

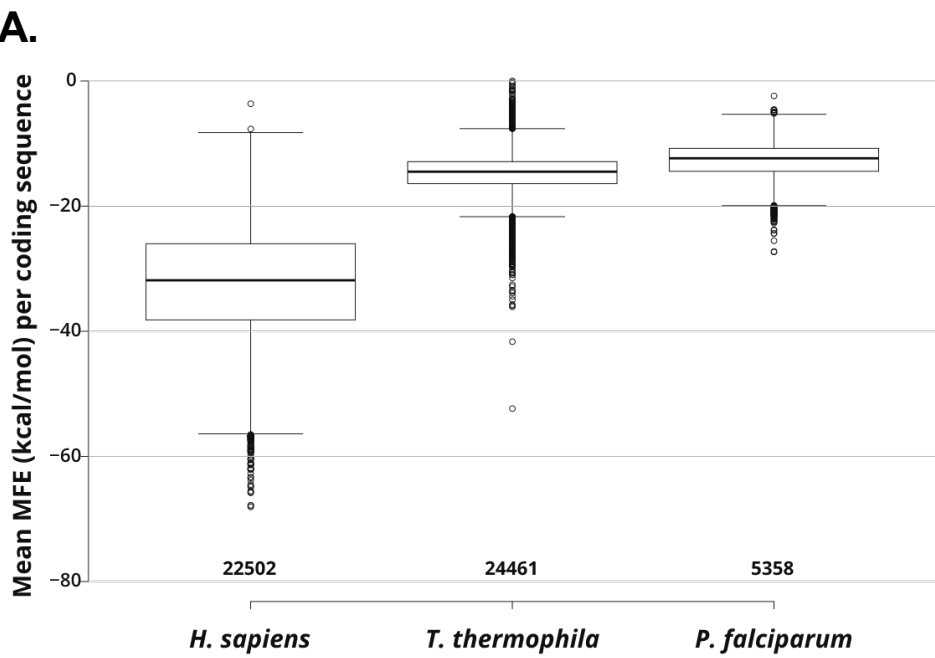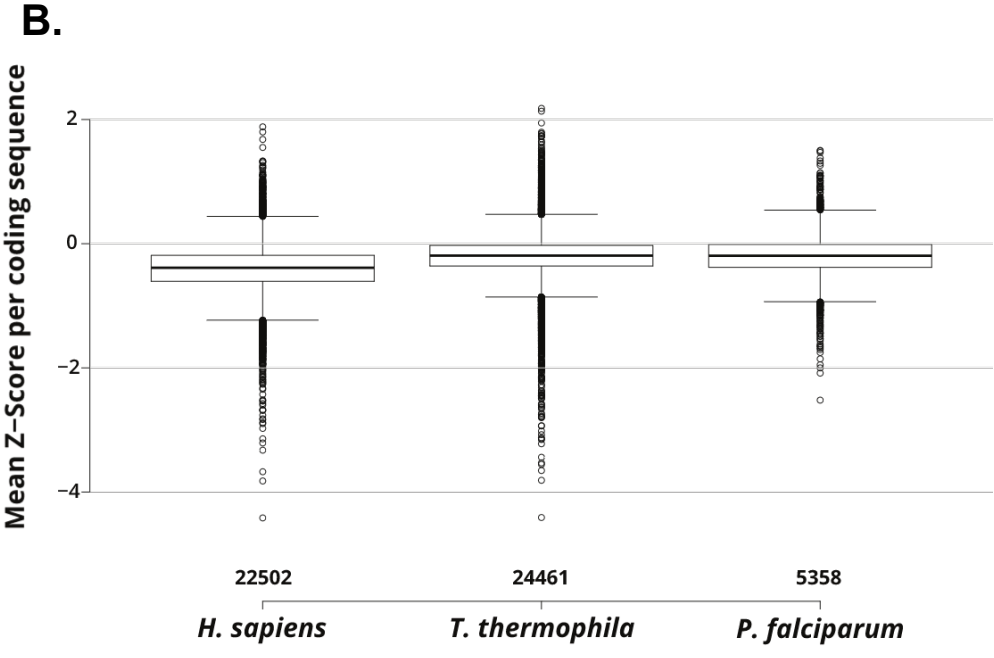

Supplement: supp [file elife-57799-supp-v1.zip]

Figure 4-figure supplement 4.

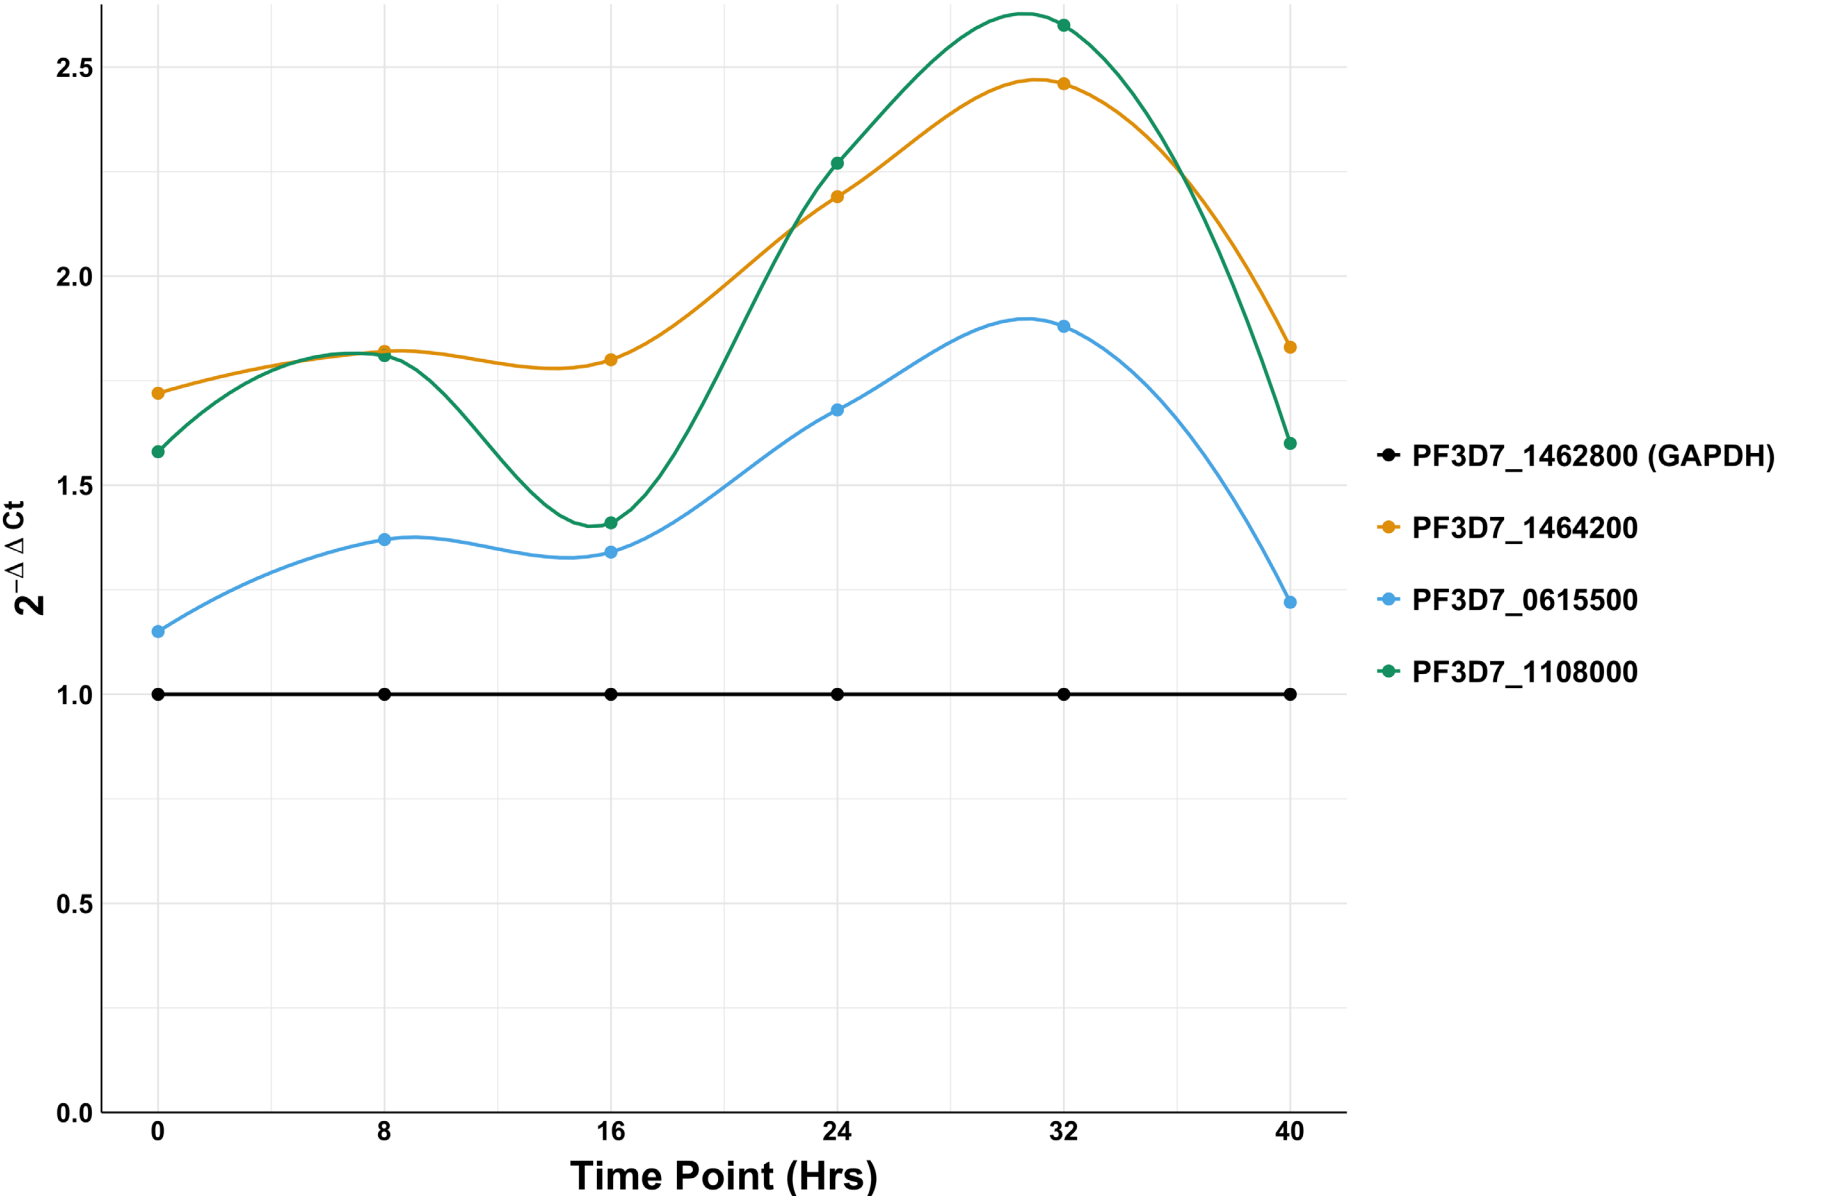

Supplement: supp [file elife-57799-supp-v1.zip]

Figure 7-figure supplement 1.

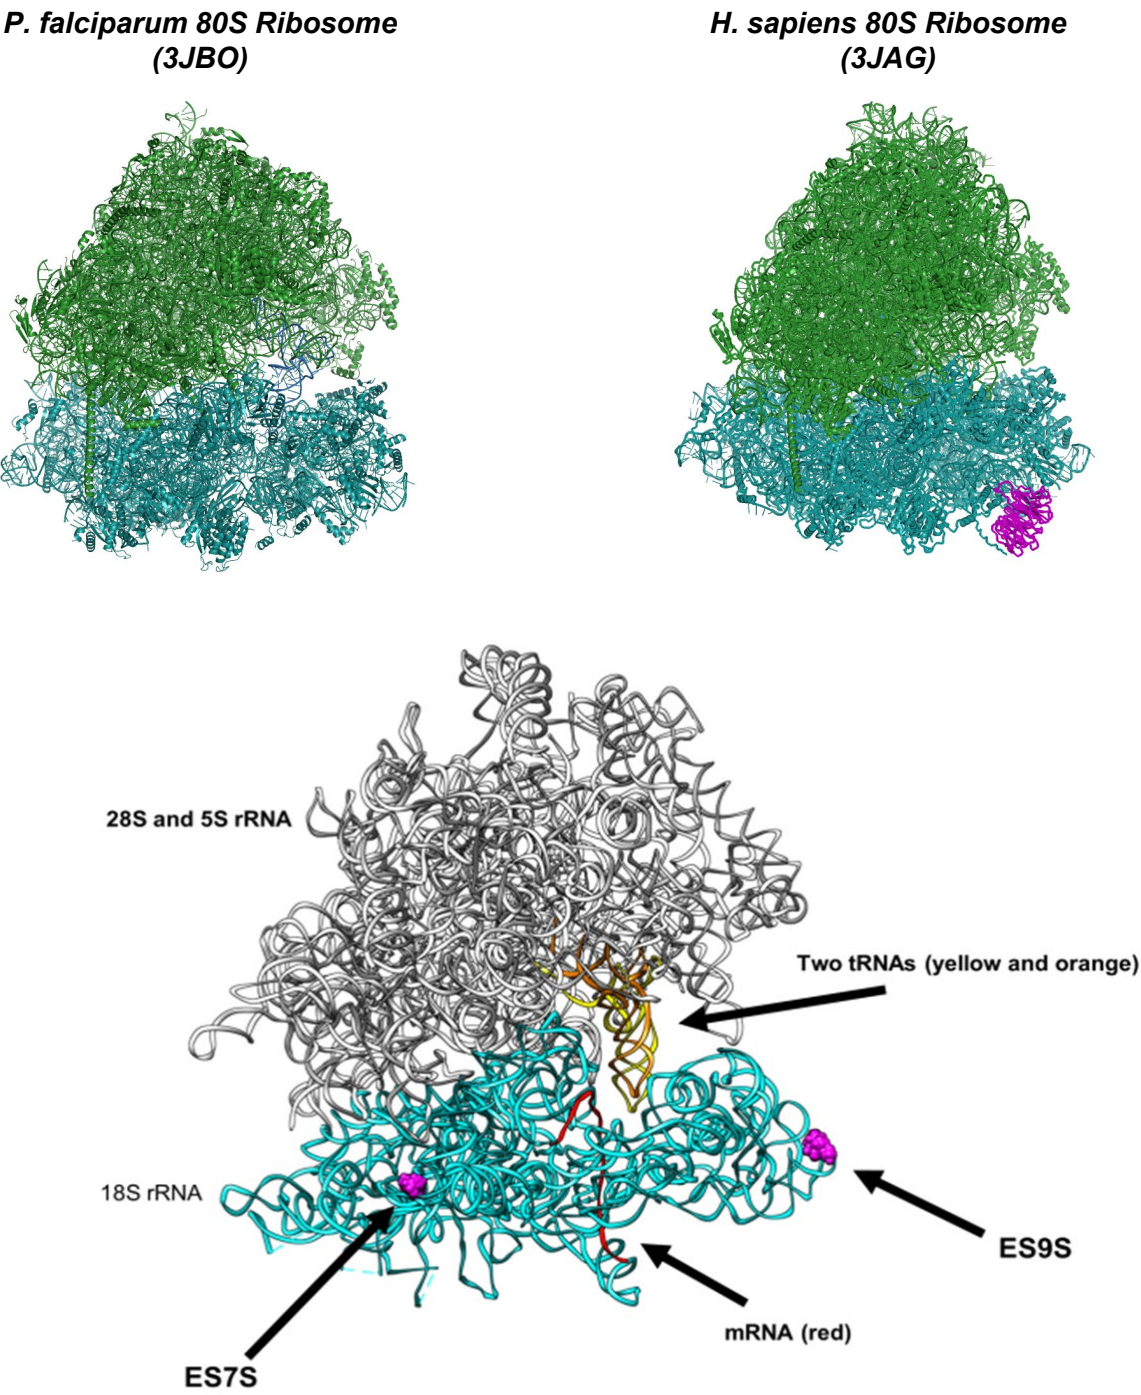

Supplement: supp [file elife-57799-supp-v1.zip]

Figure 2-figure supplement 2.

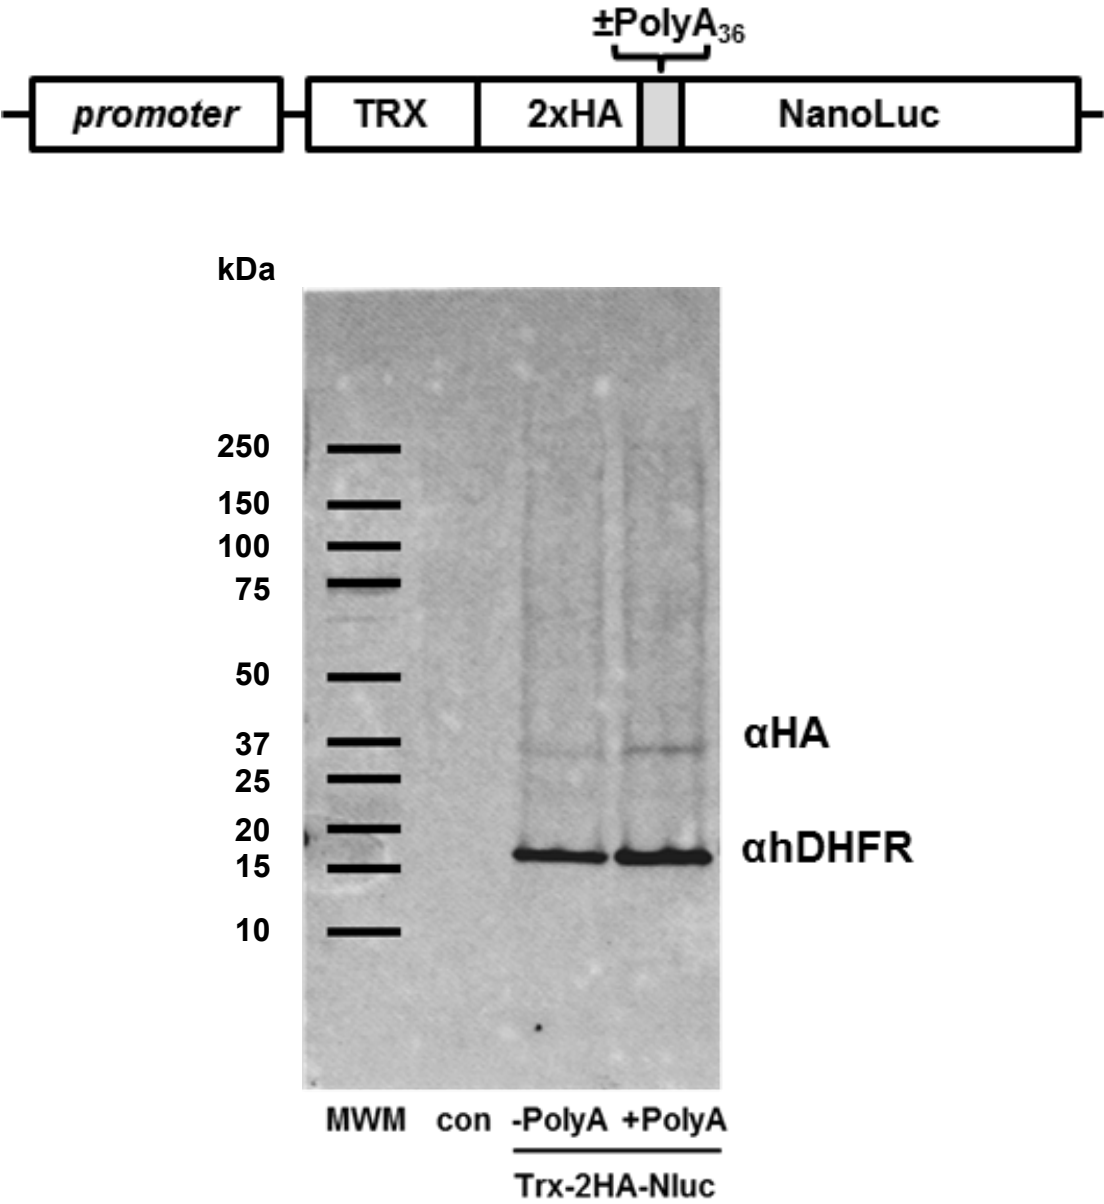

Supplement: supp [file elife-57799-supp-v1.zip]

Figure 7-figure supplement 3.

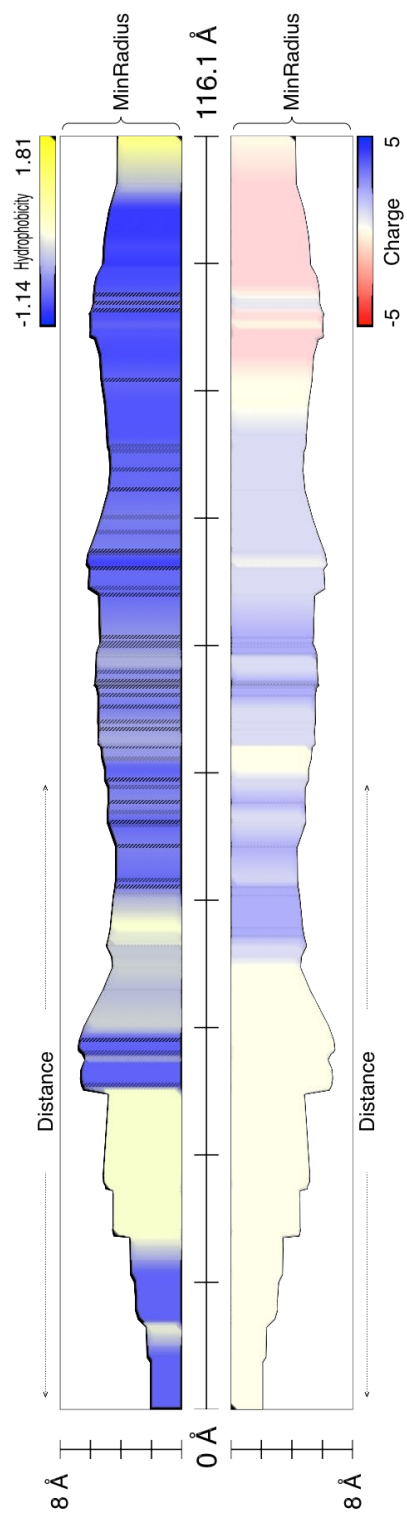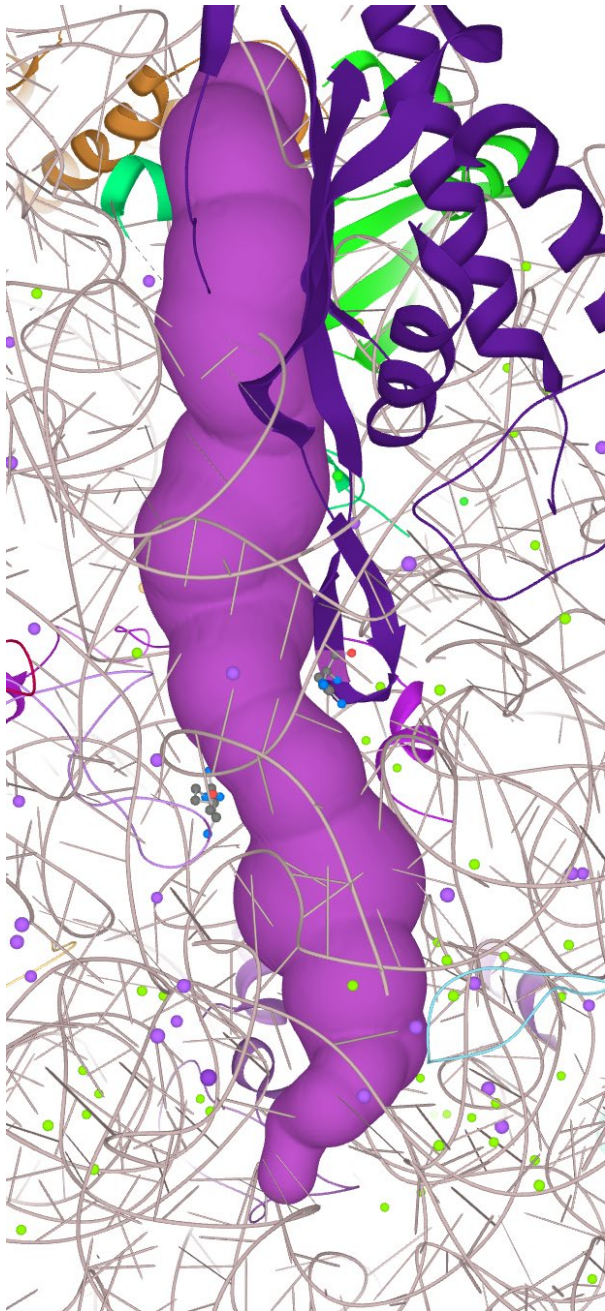

Supplement: supp [file elife-57799-supp-v1.zip]
